# Supplementary material
Source: HighWire-hosted journal article supplement (https://annals.highwire.org/content/suppl/2004/02/12/138.4.288)
Supplement: Appendix.pdf [file Appendix.pdf]

## APPENDIX

### Section A. Overview

The Appendix was developed to provide interested readers with additional detail on the methods of the study as well as supplementary findings referred to in the body of the papers that could not be included there because of space constraints. Section B provides an expanded discussion of the rationale for our study design and its relationship to “instrumental variables” analysis. Section C describes in greater detail our study populations, exclusions applied, and data quality. Section D describes in detail the rationale behind the approach and the methods used to calculate spending and utilization rates using measures free of bias that could be introduced because of differences in wages, prices, or policy payments to physicians or hospitals. Section E describes in greater detail the End-of-Life Expenditure Index (EOL-EI), the primary exposure used in the analysis, including the study population within which it was calculated and how members of each study cohort were excluded from the sample used to calculate the index used as the exposure for that cohort. Section F describes the motivation, methodology, and results of our sensitivity analysis using the Acute Care Expenditure Index.

In addition, the Appendix also includes supplementary tables that present additional detail on individual patient attributes (**Appendix Tables 1 through 4**), a table that lists specifically which variables are included in each of the major models used in the analyses (**Appendix Table 5**), the main models examining survival (**Appendix Tables 6 through 9**) and change in functional status (**Appendix Table 10**), a table presenting specific procedure rates for each chronic disease cohort and for all three cohorts combined (**Appendix Table 11**), and tables summarizing overall health care utilization rates across quintiles for each chronic disease cohort (**Appendix Tables 12 through 14**).

### Section B. Natural Randomization: Observational Research, Instrumental Variables, and Why We Did Not Use Formal Instrumental Variables Analysis

As is discussed in the overview of the study design in Parts 1 and 2, the ideal approach to addressing the study question—whether the increased spending observed in some regions of the United States leads to better care or outcomes—would be to carry out a randomized trial. However, such a trial would be difficult and would probably end up answering a slightly different question (depending on the intervention under study).

The field of economic research has addressed this problem through approaches that attempt to create a “natural randomization” through what is termed “instrumental variables” analysis. The key notion is that an exposure is identified that allows the study sample to be assigned to different “treatment groups” in a way that assures that those in different treatment groups are similar in terms of attributes that might affect the outcome (that is, that case

mix is similar in the groups). They are nonetheless treated differently.

A good example of this type of natural randomization comes from a study of how serving in the Vietnam War affected the probability of suicides and vehicular deaths (1). Clearly, comparing suicide rates for Vietnam veterans and nonveterans would be statistically suspect, since the underlying characteristics of the two groups would be expected to differ by so much. Draft lottery numbers, chosen randomly on the basis of one’s birthday, were used as a natural randomization to place men into the “treatment” group, those most likely to be sent to Vietnam, and the “control” group, those least likely to be sent. This method qualified as an instrument because it fulfilled the two (intuitive) requirements of an instrumental variable: 1) It was highly correlated with the exposure variable, which was serving in Vietnam, and 2) it was plausibly uncorrelated with the underlying mental health of the population (or, more formally, with any unmeasured differences in the populations). In other words, any differences in suicide and accident rates between the two groups were very likely to have been the result of serving (or not serving) in Vietnam, and not individual risks for suicide or poor driving. The article by Hearst and colleagues, like our articles, took a reduced-form approach to the problem. In other words, they compared what they called “draft eligible” (the treatment group) with “draft ineligible” (the control group).

By the same token, in our papers, we compared outcomes of people living in areas where the health system displays a more aggressive approach to end-of-life care with those of people living in areas where the health system displays a less aggressive approach. We have no a priori reason for believing that these populations in these regions should differ in their underlying health status, but they are treated differently.

Why didn’t we use the formal instrumental variables approach, in which we would predict how much an additional \$1000 in Medicare spending affects survival? There are three main reasons. First, we are interested primarily in the direction and general magnitude of effect, rather than in the cost of achieving that effect. We recognize that if increased expenditures across regions result in improved health outcomes, knowing the magnitude of the effect of an additional 10% increase in regional spending on survival and functional status for Medicare patients would be important for policy research. If we find no association or that higher spending is associated with lower survival, however, the precise estimate of the coefficient (in terms of dollars) is relatively unimportant. Second, instrumental variables analysis is able to provide unbiased estimates only in certain settings, one of which is a linear model. Our need to use Cox proportional hazards regression for our mortality analyses precluded a formal instrumental variables analysis using currently developed statistical tools. Finally, it is important to recognize that the fundamental

limitation of instrumental variables analysis would remain. One cannot prove that one has a perfect instrument.

We therefore presented our analysis as an observational study. We recognize that unmeasured confounding remains a possibility, but we nevertheless believe that our findings represent a major advance over previous research and that our conclusions that residence in higher-spending regions does not cause improved quality, access to care, or survival (and may cause worse survival) are sound.

### Section C. Additional Detail on the Study Samples

For all three study cohorts, we restricted the eligible population to Medicare enrollees between the ages of 65 and 99 years who, at the time of their index admission, were eligible for both Medicare Parts A and B and were not enrolled in a health maintenance organization (HMO).

#### *Patients with Myocardial Infarction*

The acute myocardial infarction (MI) cohort was drawn from the patients included in the Cooperative Cardiovascular Project, which identified from billing records a national sample of Medicare beneficiaries with discharges for acute MI that occurred between February 1994 and November 1995 (2). We excluded patients with an unconfirmed acute MI (using the same criteria as in previous studies [3]) and included only the first episode of acute MI for a given patient. Characteristics of the acute MI cohort were obtained from the medical record by trained abstractors working in the Health Care Financing Administration's Cooperative Cardiovascular Project. They collected extensive data on predefined variables, including presentation characteristics (location of MI, cardiac rhythm, blood pressure, shock, and whether cardiopulmonary resuscitation was performed), initial laboratory values, the presence of comorbid conditions, and functional status before admission. Quality of the chart review process was monitored by random reabstractions; percentage agreement was generally very high (93.3% to 94.8%) (4). Demographic information available through the administrative databases was virtually complete (for example, age, sex, ethnicity, date of death) and is believed to be highly accurate. Clinical variables had some missing values; we created an additional categorical variable (for example, "missing creatine kinase level") where appropriate.

#### *Patients with Hip Fracture and Colorectal Cancer*

We used Medicare's 100% national MedPAR files to identify the first admission between 1993 and 1995 for patients with a primary diagnosis of hip fracture or colorectal cancer with resection, using the same International Classification of Diseases, Ninth Revision, Clinical Modification codes as in earlier work (5). Hospitalization rates for these conditions vary little across regions, and incident cases are likely to be similarly ill in different communities. We excluded patients with a previous hospitalization for the same diagnosis in the year before their index stay.

Characteristics of the hip fracture and colorectal cancer cohorts were ascertained from claims data and U.S. Census data. Age, sex, race, and date of death were all ascertained from Medicare's denominator file (6). We coded the presence or absence of specific comorbid conditions by using diagnoses recorded on the discharge abstract as in previous work (5, 7). Colorectal cancer stage was defined by using the diagnoses recorded on the discharge abstract and classified as distant versus local or regional because this classification has been found to correspond most closely to reported stage according to analyses of linked Medicare-Surveillance, Epidemiology, and End Results data (8). Data from the 1990 U.S. Census, measured at the level of the ZIP code, were used to provide measures of income, education, disability status, urban or rural residence, employment, marital status, and Hispanic origin. Fewer than 1% of cohort members were missing these census variables. For those with missing values, we assigned the average of the value for other members of the study cohort residing in the same hospital referral region (HRR).

#### *General Population Sample: The Medicare Current Beneficiary Survey*

Persons in this study were participants in the access to care component of the Medicare Current Beneficiary Survey (MCBS), a continuous panel survey that is representative of the Medicare population (9). Participants are selected by using a stratified multistage geographic sample design, with oversampling of aged and disabled beneficiaries. Respondents are interviewed in both community settings and health facilities. The access to care component entails annual interviews with respondents and collects information on demographic characteristics, health insurance, health status and functioning, access to care, and satisfaction with services. Response rates to the survey have been high (10): Of the 14 530 initially asked to participate, 83.3% agreed to the interviews. Medicare claims data are available for all participants who are not enrolled in HMOs. Data collection and preparation procedures are described elsewhere (9).

We selected for inclusion in the survival analysis all MCBS participants older than age 65 years with an initial interview between 1991 and 1996, excluding HMO members and those not eligible for Medicare Part A or Part B ( $n = 23\,902$ ). The analysis of utilization were also done on essentially the same cohort ( $n = 23\,498$ ) but excluded several hundred patients because of incomplete utilization data. The analyses of baseline characteristics, access, and satisfaction excluded those with interviews in 1991 because key variables were missing for that year. The study population for analysis of baseline characteristics consisted of 18 190 patients. Analysis of decline in functional status was further restricted to those with at least 1 year of follow-up ( $n = 15\,556$ ).

Demographic data included age, race, sex, marital sta-

**Appendix Table 15. Impact of Chronic Conditions on Functional Status Scores\***

| Condition           | Change in Score Associated with Specified Condition |       | Rank of Relative Impact of Specified Condition |     |
|---------------------|-----------------------------------------------------|-------|------------------------------------------------|-----|
|                     | HALex                                               | PCS   | HALex                                          | PCS |
| Arthritis           | -8.61                                               | -2.77 | 5                                              | 4   |
| Angina or CAD       | -5.86                                               | -3.67 | 3                                              | 7   |
| Cancer              | -4.62                                               | -0.83 | 1                                              | 1   |
| Diabetes            | -11.13                                              | -3.44 | 6                                              | 6   |
| Hypertension        | -4.78                                               | -1.53 | 2                                              | 2   |
| Emphysema or asthma | -12.13                                              | -3.12 | 7                                              | 5   |
| History of MI       | -7.42                                               | -2.75 | 4                                              | 3   |
| Stroke              | -13.36                                              | -7.15 | 8                                              | 8   |
| Correlation         | 0.77                                                |       | 0.74                                           |     |

\* The change in each functional status score associated with a given chronic condition was derived from linear regression models that controlled for age, race, sex, and all chronic conditions included in each survey. Only chronic conditions common to each survey are shown. Each pair of columns compares the predicted impact of the specified chronic conditions on PCS score derived from Medical Outcomes Study Short-Form 36 and on the HALex score derived from Medicare Current Beneficiary Survey. CAD = coronary artery disease; HALex = Health Activities and Limitations Index; MI = myocardial infarction; PCS = physical component summary score.

tus, education, household income, and urban residence. Insurance coverage was coded into four mutually exclusive categories, as in others' work (11). Health status variables included self-assessed health, activities of daily living, instrumental activities of daily living, other functional impairments, a list of reported medical conditions, whether a patient was bedridden, facility residence, and smoking status. Questions on access to care included having a usual source of care, having a usual physician, having trouble getting care, delaying care because of cost, having a serious problem and not seeing a physician, as well as receiving specific preventive services. Respondents who had received medical care were asked the site or sites of care and how long they had waited to receive care. Satisfaction with medical care was assessed by using the questions used to evaluate care in previous analyses of the Medicare population (12).

We used the Health Activities and Limitations Index (HALex) to characterize participants' functional status. The HALex was developed by the National Center for Health Statistics to provide a national measure of years of healthy life that can be calculated using the responses to the National Health Interview Survey. The HALex assesses health on a continuum ranging from death (0.0) to the best possible health state (1.0). Each individual is assigned to 1 of 30 unique health states based on his or her self-perceived health (five levels) and degree of activity limitation (six levels). Multiattribute utility theory was used to develop the scoring algorithm (13). First, the best and worst states of each dimension (when examined independently) were assigned the values of 1 and 0, respectively. The distance between each response level for each dimen-

sion (activity limitation and self-perceived health) was then defined by using correspondence analysis to maximize the correlation between the two dimensions and thereby define the values for the intermediate responses on each scale. Finally, after the corners of the distribution were anchored by using utilities derived from the Health Utilities Index Mark I (14), a multiplicative model was then used to assign scores to each of the 30 unique health states. A detailed description of the methods is available elsewhere (15) and at [www.cdc.gov/nchs/data/statnt/statnt07.pdf](http://www.cdc.gov/nchs/data/statnt/statnt07.pdf).

The MCBS includes the questions required to calculate a HALex score, but because elderly participants are not asked about limitations in their major activity, only 20 of the 30 cells are used to score their responses, as in other analyses of the elderly. Several studies have reported on the construct validity of the HALex and found that the direction of effects of other patient attributes on HALex scores are as hypothesized (16). Our own models further confirm the construct validity of this measure. For example, the impact of increasing age on functional status can be seen in model A (Appendix Table 10). In model B, which includes interactions between year and age, sex, and race categories, older individuals face a significantly increased risk for decline in HALex scores over up to 3 years. In model C, which includes interaction terms between year and the chronic conditions, it can be seen that both Alzheimer disease and, to a lesser extent, Parkinson disease are associated with a significantly more rapid decline in functional status than other chronic conditions. All these effects appear plausible.

To further validate the use of HALex scores, we compared the impact of chronic conditions on MCBS participants' HALex scores with the impact of similar chronic conditions on physical component summary scores derived from the Medical Outcomes Study Short-Form 36 (17). We could not make a perfect head-to-head comparison because the wording of the questions in each survey was not identical and the MCBS survey included questions about chronic conditions not included in the Medical Outcomes Study survey. Nevertheless, when we compared the coefficients derived from age- and sex-adjusted models for the specific chronic conditions included in both data sets, we found a strong correlation overall ( $r = 0.77$ ) and in the rank order of the impact of the conditions on functional status ( $r = 0.74$ ) (Appendix Table 15).

#### **Section D. Measuring Spending Using Standard National Prices To Avoid Bias from Regional Differences in Prices or Policy Payments**

All of our utilization analyses in which dollar amounts are reported were based on measures of expenditures that have been purged of regional differences in prices or policy payments because the use of actual payments would introduce a bias. Actual reimbursements for hospital and physician services vary substantially according to geographic region due to wage, price, and policy differences (such as

subsidies for the costs of medical education). To develop a measure of Medicare spending that was free of regional differences in price and policy payments, we followed the general approach developed by the Medicare Prospective Payment Commission in an earlier report (18) to calculate spending as follows. For inpatient hospital services, we based our measure on the diagnosis-related group (DRG) weight. All DRGs are assigned a relative weight proportional to the average national cost for Medicare patients within that DRG compared to the average cost for all Medicare patients. We converted DRG weights to dollars by multiplying the weight times the national average DRG price for 1996 (\$3799). The measure reflects average national resource use for this condition. Hospital spending was defined as the sum of all DRG weights for an individual during a specified period times the DRG price. For physician services, we used the Resource-Based Relative Value Scale that forms the basis of the current Medicare physician fee schedule (19). Relative value units (RVUs) are assigned to each physician service to reflect physician work and the associated practice expense. For services included in the physician fee schedule, we assigned the total RVU value for the specific service from the Medicare fee schedule. For services not included in the fee schedule (primarily laboratory services), we calculated an RVU equivalent by dividing either the standard national price (laboratory services) or the median national allowed charge (for physician services without an RVU in the fee schedule) by the average 1996 factor (\$36.14) used to convert RVUs to dollars. When DRG weights and RVUs are used, the measure of spending treats the value of a given service equally regardless of where the service is performed in the country. The measure removes the effect of any geographic differences in prices, wages, and policy payments.

Physician spending was defined as the sum of all RVUs for a given beneficiary during a specified period times the conversion factor. Aggregate spending for an individual is calculated in dollars and equals the sum of hospital spending and physician spending.

## **Section E. Measuring the Primary Exposure: The EOL-EI in U.S. Hospital Referral Regions**

### **Definition of Health Care Service Areas**

We used the definition of HRRs developed for the Dartmouth Atlas of Health Care, which is based on where patients travel to receive cardiovascular surgery and neurosurgery (20). More than 90% of Medicare enrollees live in HRRs where over 80% of residents' care is delivered by providers within the HRR (20).

To identify a reference population who should be similarly ill across regions (at least in terms of their risk for death), we used the Medicare denominator file to identify all Medicare beneficiaries who died during the 3.5-year period between 1 July 1994 and 31 December 1997, were between 65.5 and 100 years of age at the time of death, were not enrolled in an HMO during their last 6 months

of life, and were eligible for Medicare Part A (hospital insurance) and Part B (physician) coverage. We used the entire sample for analyses of hospital utilization. To measure use of physician services, we used the subset that was included in the 5% national sample (6), as in previous work (21), because complete Medicare Part B files were available to us only for that sample.

### **Measure of Resource Use**

To ensure that regional differences in wages, prices, and policy payments did not bias our measure of regional differences in spending, we used standardized national prices (as described in Section D).

### **Calculating the End-of-Life Expenditure Index**

The reference population—all Medicare enrollees who died between mid-1994 and 1997—includes members of the study cohorts who died during this interval. Although they represent a small percentage of the reference population, we wished to avoid the possibility of spurious correlations (sicker hip fracture patients in a given region would have higher expenditures and might be more likely to die). We therefore calculated an overall EOL-EI including all enrollees that was used to prepare **Figure 2** in Part 1 and to map the regions. For each study population, however, we calculated a specific EOL-EI for use in the survival analyses (for which even a small bias could be problematic) that excluded from the reference population members of that cohort. There were thus four EOL-EIs. (Because <1% of the population were excluded, these measures were extremely highly correlated and resulted in nearly identical quintiles.) The EOL-EI was calculated as age-sex-race-adjusted spending (using the standardized national prices) on physician and hospital services by the reference population in each HRR. We sorted HRRs in order of increasing intensity and divided them into quintiles of approximately equal population size, based on the entire Medicare population older than 65 years of age.

## **Section F. Sensitivity Analyses on Survival: The Acute Care Expenditure Index**

Because of concern that our primary exposure (the EOL-EI) may not have fully accounted for differences in population characteristics in different regions, we developed an alternative measure and repeated the analyses using this measure. Although the ideal measure would be risk-adjusted differences in total Medicare spending, we know of no way to calculate such a measure using currently available data. An alternative was to define study populations in which we were reasonably confident in our case-mix measures. Given the probable similarity of the cohorts at baseline across regions, and the high quality of the risk-adjustment data for short-term mortality (for example, 6 months), we decided to use as our alternative exposure measure the regional differences in risk-adjusted 6-month utilization in the complementary cohorts as our measure of

**Appendix Table 16. Reference Populations Used To Calculate the Acute Care Expenditure Index for Each Cohort\***

| Study Population          | Reference Population in Which the Expenditure Index Was Developed  |
|---------------------------|--------------------------------------------------------------------|
| Hip fracture cohort       | Colorectal cancer cohort and acute MI cohort                       |
| Colorectal cancer cohort  | Hip fracture cohort and acute MI cohort                            |
| Acute MI cohort           | Hip fracture cohort and colorectal cancer cohort                   |
| General population (MCBS) | Hip fracture cohort, colorectal cancer cohort, and acute MI cohort |

\* MCBS = Medicare Current Beneficiary Survey; MI = myocardial infarction.

the exposure. We describe this approach, and our findings, in the sections that follow.

### Methods

We performed four parallel analyses, one for each of our cohorts. The regional spending measure for each cohort was developed using the other cohorts, as shown in **Appendix Table 16**. The expenditure index was developed by using a linear regression model. To determine risk-adjusted expenditures, we used the following equation:

$$U_{ij} = Z_1 \beta + W_j \Pi_j + v_{ij}$$

in which  $U_{ij}$  is the total hospital and physician resource use per person in the first 6 months of follow-up by patient  $i$  in HRR  $j$ ;  $Z_1$  is a vector of patient covariates, including demographic (age, sex, race, income), severity (for example, stage), and comorbidity measures;  $\beta$  is the effects of patient-level factors on utilization;  $W_j$  is the coefficient estimating regional intensity in HRR  $j$ ;  $\Pi_j$  is a set of HRR-level indicator variables (1 to 306); and  $v_{ij}$  are patient-level error terms. The regression model is run with no intercept. The expenditure index used for the colorectal cancer cohort, for example, is the average of the coefficients  $\Pi_j$  for the specific HRR generated from the hip fracture and acute MI regressions. We chose the first 6 months of utilization because the risk measures available in the data sets, especially for the acute MI cohort, are clearly most appropriate for this interval. The index for each study population was the weighted average of the coefficients for the specific HRR from each of the relevant models. We then repeated the key analyses related to survival: 1) comparing average predicted 1-year mortality rate across quintiles of the expenditure index; 2) comparing risk-adjusted utilization during both the first 6 months after the original hospitalization (where utilization rates should be relatively similar, given that all patients in the three hospitalized cohorts had an index hospitalization), and after the first 6 months of follow-up (where the most dramatic differences in utilization were seen); and 3) comparing survival across quintiles and in a model in which the expenditure index was included as a continuous variable.

### Results

The first question—whether individuals residing in HRRs classified as higher- and lower-spending have similar baseline risk factors for 1-year mortality—is addressed below. The results are similar to those with the EOL-EI. Average risk for death was flat for both hip fracture and colorectal cancer, increased for the acute MI cohort, and decreased for the MCBS sample (**Appendix Table 17**).

As in the analyses using the EOL-EI, risk-adjusted utilization rates increased across regions with higher levels of the Acute Care Expenditure Index, with a consistent but small increase during the first 6 months and a dramatic difference apparent after the acute episode. (It is important to recall that the first 6-month analysis includes the index hospitalization, which all three chronic disease cohorts experienced, resulting in smaller relative differences.) The results are similar to the findings using the EOL-EI, except in the hip fracture and colorectal cancer cohorts. In the current analyses, the ratio of utilization rates in the highest to lowest quintiles was somewhat lower than in the original analyses (1.42 vs. 1.75 and 1.58 vs. 1.75) (**Appendix Table 18**).

Further analyses indicated that the range of spending rates was probably lower across quintiles of the Acute Care Expenditure Index because the two cohorts in which the risk-adjusted expenditure index were developed for the hip fracture cohort were comparatively small, introducing greater measurement error.

Finally, we repeated the survival models (**Appendix Table 19**). The findings are similar but not identical to those presented in Part 2. Instead of the findings of statistically significant coefficients showing a small increase in the risk for death in the highest quintiles (and in the continuous models that are the appropriate test for trend), the analyses with the Acute Care Expenditure index are essentially flat.

**Appendix Table 17. Average Predicted Mortality Rate across Quintiles of the Acute Care Expenditure Index\***

| Cohort            | Average Predicted Mortality Rate             |      |      |      |                |
|-------------------|----------------------------------------------|------|------|------|----------------|
|                   | Quintile of the Acute Care Expenditure Index |      |      |      |                |
|                   | 1<br>(Lowest)                                | 2    | 3    | 4    | 5<br>(Highest) |
|                   | ← % →                                        |      |      |      |                |
| Hip fracture      | 24.1                                         | 24.1 | 24.2 | 24.0 | 24.0           |
| Colorectal cancer | 21.2                                         | 20.8 | 20.9 | 20.9 | 20.9           |
| Acute MI          | 31.2                                         | 31.3 | 32.0 | 31.9 | 33.1           |
| MCBS              | 6.2                                          | 5.7  | 6.0  | 6.0  | 5.5            |

\* Average predicted mortality rate = percentage of patients dead at 1 year. MCBS = Medicare Current Beneficiary Survey; MI = myocardial infarction.

**Appendix Table 18. Ratio of Risk-Adjusted Utilization Rates for Each Cohort in the Specified Quintile of Medicare Spending to Spending in the Lowest-Cost Regions\***

| Variable                 | Ratio of Risk-Adjusted Utilization Rates for Each Quintile of the Acute Care Expenditure Index Compared with Quintile 1 |      |      |      |                | Ratio of Quintile 5 to Quintile 1 Based on EOL-EI |
|--------------------------|-------------------------------------------------------------------------------------------------------------------------|------|------|------|----------------|---------------------------------------------------|
|                          | Quintile                                                                                                                |      |      |      |                |                                                   |
|                          | 1<br>(Lowest)                                                                                                           | 2    | 3    | 4    | 5<br>(Highest) |                                                   |
| <b>First 6 months</b>    |                                                                                                                         |      |      |      |                |                                                   |
| Hip fracture cohort      | 1.00 (referent)                                                                                                         | 1.04 | 1.08 | 1.09 | 1.15           | 1.17                                              |
| Colorectal cancer cohort | 1.00 (referent)                                                                                                         | 1.01 | 1.03 | 1.05 | 1.09           | 1.12                                              |
| Acute MI cohort          | 1.00 (referent)                                                                                                         | 1.05 | 1.06 | 1.14 | 1.15           | 1.18                                              |
| MCBS cohort              | 1.00 (referent)                                                                                                         | 1.18 | 1.20 | 1.48 | 1.62           | NA                                                |
| <b>After 6 months</b>    |                                                                                                                         |      |      |      |                |                                                   |
| Hip fracture cohort      | 1.00 (referent)                                                                                                         | 1.04 | 1.23 | 1.30 | 1.42           | 1.69                                              |
| Colorectal cancer cohort | 1.00 (referent)                                                                                                         | 1.15 | 1.25 | 1.46 | 1.58           | 1.59                                              |
| Acute MI cohort          | 1.00 (referent)                                                                                                         | 1.21 | 1.30 | 1.37 | 1.82           | 1.77                                              |
| MCBS cohort              | 1.00 (referent)                                                                                                         | 1.09 | 1.14 | 1.29 | 1.55           | 1.52                                              |

\* EOL-EI = End-of-Life Expenditure Index; MCBS = Medicare Current Beneficiary Survey; MI = myocardial infarction; NA = not applicable.

**Discussion**

In summary, we found that our overall results using the new expenditure index were similar to the findings using the EOL-EI, especially if it is considered that our essential message is that there are dramatic differences in utilization across regions of increasing Medicare expenditures, that these utilization differences are not explained by underlying illness rates, and that the increased utilization is not associated with any gain in life expectancy. The relative consistency of these findings across the cohorts strengthens our confidence in this inference.

At the same time, because the findings are not identical, it may be worth considering a closely related question: Which measure is “better”? It could be argued that the EOL-EI is better because 1) it has less measurement error because it was calculated using much larger sample sizes; 2) it may be a better measure of the propensity of physicians

in a region for “overuse”; and 3) it leads to slightly better stratification of HRRs into regions of higher and lower spending.

The argument for the Acute Care Expenditure Index based on first 6-month cohort-specific use is the following: 1) It may allow for better adjustment for possible differences in illness across regions of differing spending levels; and 2) it may be a better measure of regional differences in the propensity of physicians to provide extra care to patients with specific, clear-cut needs (for example, in the acute phase of an injury or illness).

We cannot know which measure is “right” or gives the “better” answer. The new index suggests that even when regions are stratified according to differences in how they treat patients during an acute illness episode, however, those regions that take the more intensive approach do not achieve consistently better survival.

**Table 19. Association between Acute Care Expenditure Index in Hospital Referral Region of Residence and Cohort-Specific Risk-Adjusted Long-Term Mortality Rates (Sensitivity Analysis)\***

| Cohort            | Relative Risk (95% CI) |                     |                     |                     |                     | Continuous Models   |
|-------------------|------------------------|---------------------|---------------------|---------------------|---------------------|---------------------|
|                   | Quintile of AC-EI      |                     |                     |                     |                     |                     |
|                   | 1<br>(Lowest)          | 2                   | 3                   | 4                   | 5<br>(Highest)      |                     |
| Hip fracture      | 1.00 (referent)        | 1.003 (0.989–1.016) | 0.998 (0.984–1.013) | 0.993 (0.978–1.009) | 0.996 (0.979–1.014) | 0.990 (0.983–0.998) |
| Colorectal cancer | 1.00 (referent)        | 1.024 (0.994–1.055) | 1.028 (0.995–1.062) | 1.022 (0.987–1.057) | 0.995 (0.959–1.032) | 1.000 (0.985–1.016) |
| Acute MI          | 1.00 (referent)        | 1.025 (0.999–1.053) | 1.029 (1.000–1.058) | 1.027 (0.997–1.059) | 1.037 (1.004–1.071) | 1.009 (0.996–1.023) |
| MCBS              | 1.00 (referent)        | 1.19 (1.04–1.36)    | 1.16 (0.98–1.37)    | 1.05 (0.92–1.18)    | 1.08 (0.95–1.23)    | 0.99 (0.94–1.05)    |

\* Data were obtained from Cox regression models testing the association between residence in higher-spending hospital referral regions (defined on the basis of the AC-EI) and mortality for up to 5 years. For the quintile models, hospital referral regions were grouped into quintiles of increasing AC-EI levels. For the continuous models, data represent the relative risk for death associated with a 10% increase in AC-EI score in the hospital referral region of residence. For additional details, see Appendix, Section F, available at [www.annals.org](http://www.annals.org). AC-EI = Acute Care Expenditure Index; MCBS = Medicare Current Beneficiary Survey; MI = myocardial infarction.

**Appendix Table 1. Characteristics of the Hip Fracture Cohort according to Level of Medicare Spending in Hospital Referral Region of Residence\***

| Characteristic                       | Quintile of EOL-EI |         |         |         |                | Odds Ratio (95% CI)† |
|--------------------------------------|--------------------|---------|---------|---------|----------------|----------------------|
|                                      | 1<br>(Lowest)      | 2       | 3       | 4       | 5<br>(Highest) |                      |
| Cohort members, <i>n</i>             | 121 354            | 129 815 | 125 412 | 121 697 | 116 225        |                      |
| Demographic, %                       |                    |         |         |         |                |                      |
| Age 65–74 y                          | 16.4               | 17.1    | 17.2    | 17.9    | 17.0           | 1.007 (1.003–1.010)  |
| Age 75–84 y                          | 41.6               | 42.7    | 42.9    | 42.9    | 42.4           | 1.003 (1.001–1.006)  |
| Age ≥85 y                            | 42.0               | 40.2    | 39.9    | 39.2    | 40.6           | 0.992 (0.990–0.995)  |
| Women                                | 76.6               | 77.9    | 78.4    | 78.1    | 78.3           | 1.017 (1.014–1.020)  |
| Black race                           | 1.1                | 3.1     | 4.0     | 5.2     | 4.8            | 1.202 (1.194–1.210)  |
| Comorbid conditions, %‡              |                    |         |         |         |                |                      |
| 0                                    | 55.4               | 55.7    | 55.4    | 54.7    | 57.1           | 1.013 (1.010–1.016)  |
| 1                                    | 31.4               | 31.4    | 31.8    | 32.1    | 30.5           | 0.991 (0.989–0.994)  |
| 2                                    | 9.1                | 9.0     | 8.9     | 9.1     | 8.6            | 0.990 (0.985–0.994)  |
| 3                                    | 2.3                | 2.2     | 2.2     | 2.3     | 2.1            | 0.982 (0.974–0.991)  |
| 4                                    | 0.5                | 0.5     | 0.4     | 0.4     | 0.4            | 0.964 (0.946–0.983)  |
| ≥5                                   | 1.3                | 1.2     | 1.2     | 1.3     | 1.3            | 1.007 (0.996–1.019)  |
| Social Security income, %§           |                    |         |         |         |                |                      |
| <\$1700                              | 18.8               | 19.3    | 19.0    | 23.6    | 21.3           | 1.055 (1.052–1.059)  |
| \$1700–\$2099                        | 21.5               | 24.9    | 24.3    | 22.5    | 17.3           | 0.963 (0.960–0.966)  |
| \$2100–\$2600                        | 35.3               | 31.5    | 29.3    | 25.4    | 22.2           | 0.887 (0.884–0.890)  |
| >\$2600                              | 24.3               | 24.3    | 27.3    | 28.5    | 39.2           | 1.111 (1.108–1.114)  |
| Migration status, %                  |                    |         |         |         |                |                      |
| Moved in previous 1 or 2 years       | 2.99               | 2.68    | 2.51    | 3.06    | 2.76           | 1.008 (1.002–1.014)  |
| Region of residence, %               |                    |         |         |         |                |                      |
| New England                          | 6.4                | 7.6     | 5.4     | 10.3    | 0.0            |                      |
| Mid-Atlantic                         | 9.4                | 6.9     | 8.2     | 6.3     | 50.9           |                      |
| South Atlantic                       | 6.7                | 21.7    | 16.0    | 31.7    | 18.7           |                      |
| Great Lakes                          | 15.0               | 32.2    | 9.9     | 16.0    | 14.1           |                      |
| East South Central                   | 0.0                | 0.7     | 22.7    | 11.4    | 0.4            |                      |
| Great Plains                         | 20.7               | 10.6    | 13.3    | 0.1     | 0.0            |                      |
| West South Central                   | 3.6                | 8.6     | 18.1    | 18.9    | 4.1            |                      |
| Mountain                             | 15.8               | 5.5     | 0.4     | 1.5     | 0.0            |                      |
| Pacific                              | 22.4               | 6.3     | 6.1     | 3.7     | 11.8           |                      |
| Other regional attributes, %         |                    |         |         |         |                |                      |
| Patients residing in rural ZIP codes | 22.5               | 17.8    | 17.3    | 10.4    | 2.7            | 0.735 (0.732–0.738)  |
| Index hospital characteristics, %    |                    |         |         |         |                |                      |
| Lowest volume (<30¶)                 | 14.7               | 9.3     | 10.6    | 9.1     | 6.7            | 0.867 (0.863–0.871)  |
| Low volume (30–≤74¶)                 | 29.2               | 31.6    | 28.8    | 29.3    | 30.1           | 0.994 (0.991–0.997)  |
| Medium volume (75–≤150¶)             | 39.5               | 40.3    | 43.9    | 39.3    | 42.7           | 1.008 (1.006–1.011)  |
| High volume (>150¶)                  | 16.6               | 18.8    | 16.7    | 22.3    | 20.5           | 1.078 (1.074–1.081)  |
| Nonteaching hospital                 | 70.9               | 67.6    | 71.6    | 63.4    | 48.9           | 0.833 (0.831–0.835)  |
| Minor teaching hospital              | 14.9               | 13.1    | 12.8    | 15.6    | 18.1           | 1.062 (1.059–1.066)  |
| Major teaching hospital              | 14.1               | 19.2    | 15.6    | 21.0    | 33.0           | 1.225 (1.221–1.229)  |

\* EOL-EI = End-of-Life Expenditure Index.

† Odds ratio for \$1000 change in EOL-EI.

‡ Based on the Charlson Comorbidity Index.

§ Monthly income of ZIP code of residence.

|| Significance of difference between quintiles not tested.

¶ Number of cohort members treated during the enrollment period.

**Appendix Table 2. Characteristics of the Colorectal Cancer Cohort according to Level of Medicare Spending in Hospital Referral Region of Residence\***

| Characteristic                       | Quintile of EOL-EI |        |        |        |                | Odds Ratio (95% CI)† |
|--------------------------------------|--------------------|--------|--------|--------|----------------|----------------------|
|                                      | 1<br>(Lowest)      | 2      | 3      | 4      | 5<br>(Highest) |                      |
| Cohort members, <i>n</i>             | 36 806             | 40 038 | 37 317 | 40 001 | 41 267         |                      |
| Demographic, %                       |                    |        |        |        |                |                      |
| Age 65–74 y                          | 42.6               | 44.1   | 44.4   | 45.3   | 43.3           | 1.001 (0.996–1.006)  |
| Age 75–84 y                          | 42.5               | 41.7   | 41.6   | 40.6   | 42.6           | 1.000 (0.995–1.005)  |
| Age ≥85 y                            | 15.0               | 14.2   | 14.1   | 14.1   | 14.2           | 0.998 (0.992–1.004)  |
| Women                                | 53.7               | 54.1   | 55.0   | 53.2   | 53.6           | 1.000 (0.996–1.005)  |
| Black race                           | 2.1                | 5.9    | 7.7    | 9.6    | 9.2            | 1.206 (1.196–1.217)  |
| Cancer stage, %                      |                    |        |        |        |                |                      |
| Local                                | 59.6               | 60.2   | 60.1   | 60.5   | 59.7           | 1.004 (0.999–1.009)  |
| Regional                             | 19.4               | 19.7   | 19.2   | 19.3   | 19.7           | 1.002 (0.996–1.008)  |
| Distant                              | 21.1               | 20.1   | 20.7   | 20.2   | 20.5           | 0.992 (0.987–0.998)  |
| Comorbid conditions, %‡              |                    |        |        |        |                |                      |
| 0                                    | 68.7               | 68.3   | 67.6   | 66.9   | 67.3           | 0.989 (0.984–0.994)  |
| 1                                    | 23.0               | 23.5   | 23.8   | 24.3   | 23.8           | 1.007 (1.002–1.013)  |
| 2                                    | 6.5                | 6.4    | 6.8    | 6.9    | 7.0            | 1.013 (1.004–1.022)  |
| 3                                    | 1.6                | 1.5    | 1.5    | 1.6    | 1.7            | 1.011 (0.993–1.029)  |
| 4                                    | 0.3                | 0.2    | 0.3    | 0.3    | 0.3            | 1.036 (0.992–1.082)  |
| ≥5                                   | 0.0                | 0.0    | 0.0    | 0.1    | 0.0            | 1.011 (0.904–1.130)  |
| Social Security income, %§           |                    |        |        |        |                |                      |
| <\$1700                              | 17.6               | 17.3   | 17.6   | 22.0   | 18.9           | 1.052 (1.046–1.058)  |
| \$1700–\$2099                        | 21.1               | 24.2   | 23.6   | 22.1   | 16.9           | 0.962 (0.956–0.967)  |
| \$2100–\$2600                        | 35.6               | 32.8   | 29.4   | 24.9   | 22.0           | 0.878 (0.874–0.883)  |
| >\$2600                              | 25.8               | 25.7   | 29.5   | 31.1   | 42.1           | 1.121 (1.115–1.126)  |
| Migration status, %                  |                    |        |        |        |                |                      |
| Moved in previous 1 or 2 years       | 5.31               | 4.99   | 4.47   | 5.51   | 5.65           | 0.992 (0.978–1.005)  |
| Region of residence, %               |                    |        |        |        |                |                      |
| New England                          | 7.4                | 8.6    | 6.2    | 11.3   | 0.0            |                      |
| Mid-Atlantic                         | 9.5                | 9.8    | 10.2   | 7.3    | 53.8           |                      |
| South Atlantic                       | 5.9                | 19.4   | 18.0   | 32.4   | 17.2           |                      |
| Great Lakes                          | 18.0               | 32.7   | 10.7   | 17.0   | 15.9           |                      |
| East South Central                   | 0.0                | 0.3    | 20.8   | 10.3   | 0.1            |                      |
| Great Plains                         | 21.1               | 9.8    | 12.6   | 0.1    | 0.0            |                      |
| West South Central                   | 3.0                | 7.3    | 15.2   | 17.1   | 3.6            |                      |
| Mountain                             | 13.7               | 5.3    | 0.3    | 1.4    | 0.0            |                      |
| Pacific                              | 21.4               | 6.8    | 5.9    | 3.1    | 9.4            |                      |
| Other regional attributes, %         |                    |        |        |        |                |                      |
| Patients residing in rural ZIP codes | 25.3               | 18.7   | 18.0   | 10.5   | 3.0            | 0.708 (0.702–0.713)  |
| Index hospital characteristics, %    |                    |        |        |        |                |                      |
| Lowest volume (≤10¶)                 | 19.4               | 13.7   | 15.7   | 11.6   | 7.3            | 0.838 (0.832–0.844)  |
| Low volume (10–≤24¶)                 | 31.0               | 28.9   | 29.6   | 25.5   | 22.4           | 0.922 (0.917–0.927)  |
| Medium volume (25–≤50¶)              | 35.4               | 39.0   | 34.4   | 34.5   | 40.6           | 1.013 (1.008–1.018)  |
| High volume (>50¶)                   | 14.3               | 18.5   | 20.3   | 28.5   | 29.8           | 1.201 (1.194–1.207)  |
| Nonteaching hospital                 | 70.0               | 64.3   | 67.0   | 58.8   | 45.5           | 0.823 (0.819–0.827)  |
| Minor teaching hospital              | 14.3               | 13.3   | 13.4   | 15.4   | 16.4           | 1.043 (1.036–1.050)  |
| Major teaching hospital              | 15.6               | 22.5   | 19.6   | 25.8   | 38.0           | 1.242 (1.236–1.249)  |

\* EOL-EI = End-of-Life Expenditure Index.

† Odds ratio for \$1000 change in EOL-EI.

‡ Based on the Charlson Comorbidity Index.

§ Income of ZIP code of residence.

|| Significance of difference between quintiles not tested.

¶ Number of cohort members treated during the enrollment period.

**Appendix Table 3. Characteristics of the Acute Myocardial Infarction Cohort according to Level of Medicare Spending in Hospital Referral Region of Residence\***

| Characteristic                                | Quintile of EOL-EI |        |        |        |                | Odds Ratio (95% CI)† |
|-----------------------------------------------|--------------------|--------|--------|--------|----------------|----------------------|
|                                               | 1<br>(Lowest)      | 2      | 3      | 4      | 5<br>(Highest) |                      |
| Cohort members, <i>n</i>                      | 28 448             | 32 193 | 33 727 | 33 449 | 31 583         |                      |
| Demographic, %                                |                    |        |        |        |                |                      |
| Age 65–74 y                                   | 44.5               | 46.0   | 46.3   | 45.9   | 41.9           | 0.976 (0.970–0.981)  |
| Age 75–84 y                                   | 40.3               | 39.4   | 38.6   | 39.2   | 40.8           | 1.004 (0.999–1.010)  |
| Age ≥85 y                                     | 15.2               | 14.6   | 15.0   | 14.9   | 17.3           | 1.040 (1.033–1.048)  |
| Women                                         | 46.6               | 48.5   | 49.2   | 49.1   | 49.9           | 1.022 (1.017–1.027)  |
| Black race                                    | 1.9                | 4.9    | 6.2    | 7.7    | 7.2            | 1.185 (1.172–1.198)  |
| Comorbid conditions and other risk factors, % |                    |        |        |        |                |                      |
| Previous revascularization                    | 17.5               | 17.0   | 17.1   | 18.2   | 16.5           | 0.991 (0.984–0.998)  |
| Previous MI                                   | 28.7               | 30.3   | 28.7   | 29.6   | 28.6           | 0.996 (0.990–1.002)  |
| History of congestive heart failure           | 19.9               | 21.4   | 20.4   | 21.2   | 22.2           | 1.023 (1.016–1.029)  |
| History of low ejection fraction              | 3.7                | 4.1    | 4.0    | 4.1    | 3.6            | 0.996 (0.982–1.010)  |
| History of hypertension                       | 58.7               | 61.0   | 61.8   | 62.6   | 63.6           | 1.038 (1.033–1.044)  |
| History of angina                             | 44.6               | 45.0   | 45.5   | 45.6   | 48.4           | 1.029 (1.024–1.035)  |
| Peripheral vascular disease                   | 9.0                | 9.7    | 10.7   | 11.1   | 11.6           | 1.056 (1.047–1.065)  |
| Diabetes                                      | 28.5               | 30.8   | 30.5   | 31.0   | 31.3           | 1.023 (1.017–1.029)  |
| Dementia                                      | 5.1                | 5.6    | 5.9    | 6.0    | 6.3            | 1.040 (1.029–1.052)  |
| Leukemia                                      | 0.6                | 0.6    | 0.5    | 0.6    | 0.6            | 0.985 (0.951–1.021)  |
| Metastatic cancer                             | 0.8                | 0.7    | 0.7    | 0.7    | 0.9            | 1.030 (0.999–1.061)  |
| Nonmetastatic cancer                          | 1.5                | 1.5    | 1.4    | 1.5    | 1.5            | 1.004 (0.982–1.026)  |
| Terminal illness                              | 0.4                | 0.3    | 0.4    | 0.4    | 0.4            | 0.988 (0.945–1.032)  |
| Smoker                                        | 14.5               | 15.6   | 16.3   | 15.4   | 13.0           | 0.975 (0.968–0.982)  |
| COPD                                          | 19.4               | 20.6   | 21.2   | 21.1   | 19.1           | 0.997 (0.990–1.003)  |
| Characteristics of acute MI, %                |                    |        |        |        |                |                      |
| Non-Q-wave                                    | 37.4               | 39.5   | 38.9   | 40.2   | 42.4           | 1.037 (1.031–1.042)  |
| Anterior                                      | 31.8               | 30.7   | 31.2   | 31.3   | 31.1           | 0.999 (0.993–1.004)  |
| Inferior                                      | 21.3               | 20.7   | 20.3   | 19.4   | 18.0           | 0.960 (0.953–0.966)  |
| Other location                                | 9.6                | 9.1    | 9.5    | 9.0    | 8.4            | 0.977 (0.968–0.986)  |
| Fibrillation                                  | 9.4                | 8.9    | 8.9    | 8.9    | 9.5            | 1.004 (0.995–1.013)  |
| Heart block                                   | 15.6               | 15.4   | 15.1   | 15.3   | 15.7           | 1.003 (0.995–1.010)  |
| Received CPR                                  | 3.8                | 3.3    | 3.6    | 3.9    | 3.5            | 1.001 (0.987–1.015)  |
| Congestive heart failure                      | 25.7               | 27.9   | 28.1   | 28.1   | 30.9           | 1.045 (1.039–1.051)  |
| Shock                                         | 2.8                | 2.2    | 2.6    | 2.4    | 2.6            | 0.997 (0.981–1.014)  |
| Hypotension                                   | 4.1                | 3.9    | 3.8    | 3.6    | 3.7            | 0.983 (0.970–0.997)  |
| Peak creatine kinase level >1000 IU/L         | 32.1               | 31.3   | 31.7   | 30.2   | 30.1           | 0.983 (0.977–0.988)  |
| Transferred from emergency department         | 3.6                | 3.9    | 4.1    | 3.2    | 1.2            | 0.863 (0.850–0.877)  |
| Transferred from the hospital                 | 7.7                | 7.9    | 7.4    | 6.3    | 5.2            | 0.916 (0.906–0.926)  |
| Social Security income, %‡                    |                    |        |        |        |                |                      |
| <\$1700                                       | 17.5               | 18.2   | 17.9   | 22.4   | 18.4           | 1.045 (1.038–1.052)  |
| \$1700–\$2099                                 | 22.1               | 25.9   | 23.9   | 22.7   | 16.6           | 0.947 (0.941–0.953)  |
| \$2100–\$2600                                 | 35.4               | 31.9   | 30.3   | 25.2   | 22.1           | 0.880 (0.875–0.886)  |
| >\$2600                                       | 25.1               | 24.0   | 27.8   | 29.7   | 42.9           | 1.142 (1.135–1.148)  |
| Region of residence, %                        |                    |        |        |        |                |                      |
| New England                                   | 7.4                | 9.0    | 5.2    | 11.7   | 0.0            | §                    |
| Mid-Atlantic                                  | 11.0               | 6.1    | 9.8    | 6.7    | 42.5           | §                    |
| South Atlantic                                | 8.0                | 24.1   | 17.6   | 32.0   | 16.8           | §                    |
| Great Lakes                                   | 15.7               | 32.4   | 19.0   | 17.5   | 26.9           | §                    |
| East South Central                            | 0.0                | 0.5    | 20.1   | 6.2    | 0.4            | §                    |
| Great Plains                                  | 13.9               | 12.6   | 7.1    | 0.0    | 0.0            | §                    |
| West South Central                            | 5.9                | 4.2    | 15.7   | 20.6   | 4.8            | §                    |
| Mountain                                      | 17.4               | 5.3    | 0.9    | 2.4    | 0.0            | §                    |
| Pacific                                       | 20.6               | 5.9    | 4.6    | 2.9    | 8.7            | §                    |
| Migration status, %                           |                    |        |        |        |                |                      |
| Moved in previous 1 or 2 years                | 3.57               | 3.46   | 2.96   | 3.85   | 3.56           | 1.000 (0.985–1.014)  |
| Other regional attributes, %                  |                    |        |        |        |                |                      |
| Patients residing in rural ZIP codes          | 26.4               | 21.5   | 20.2   | 12.4   | 3.5            | 0.718 (0.712–0.724)  |
| Index hospital characteristics, %             |                    |        |        |        |                |                      |
| Lowest volume (≤57  )                         | 35.8               | 26.2   | 27.6   | 22.3   | 13.9           | 0.811 (0.806–0.816)  |
| Low volume (57–≤116  )                        | 23.3               | 27.3   | 24.2   | 22.6   | 27.2           | 1.022 (1.016–1.028)  |
| Medium volume (116–≤201  )                    | 22.0               | 23.2   | 21.5   | 26.4   | 30.8           | 1.080 (1.073–1.086)  |
| High volume (>201  )                          | 18.9               | 23.3   | 26.7   | 28.6   | 28.1           | 1.102 (1.095–1.109)  |
| Nonteaching hospital                          | 71.7               | 66.3   | 71.1   | 62.9   | 47.8           | 0.823 (0.818–0.827)  |
| Minor teaching hospital                       | 12.9               | 12.3   | 13.0   | 13.9   | 18.2           | 1.105 (1.096–1.113)  |
| Major teaching hospital                       | 15.5               | 21.4   | 15.9   | 23.2   | 34.0           | 1.203 (1.196–1.211)  |

\* COPD = chronic obstructive pulmonary disease; CPR = cardiopulmonary resuscitation; EOL-EI = End-of-Life Expenditure Index; MI = myocardial infarction.

† Odds ratio for \$1000 change in EOL-EI.

‡ Monthly income of ZIP code of residence.

§ Significance of difference between quintiles not tested.

|| Number of cohort members treated during the enrollment period.

**Appendix Table 4. Characteristics of the Medicare Current Beneficiary Survey Cohort according to Level of Medicare Spending in Hospital Referral Region of Residence\***

| Characteristic                   | Quintile of EOL-EI |      |      |      |                | Odds Ratio (95% CI)† |
|----------------------------------|--------------------|------|------|------|----------------|----------------------|
|                                  | 1<br>(Lowest)      | 2    | 3    | 4    | 5<br>(Highest) |                      |
| Respondents, <i>n</i>            | 4064               | 3725 | 2476 | 3893 | 4032           |                      |
| Demographic, %                   |                    |      |      |      |                |                      |
| Age 65–74 y                      | 55.7               | 55.1 | 56.6 | 57.5 | 54.7           | 0.999 (0.984–1.014)  |
| Age 75–84 y                      | 33.6               | 34.2 | 32.6 | 32.6 | 34.8           | 1.004 (0.990–1.019)  |
| Age ≥85 y                        | 10.7               | 10.7 | 10.8 | 9.9  | 10.4           | 0.993 (0.974–1.011)  |
| Women                            | 58.2               | 59.3 | 61.2 | 59.6 | 60.3           | 1.010 (0.995–1.026)  |
| Black race                       | 3.5                | 5.2  | 10.4 | 8.3  | 9.9            | 1.199 (1.130–1.271)  |
| Hispanic origin                  | 2.3                | 1.7  | 3.5  | 3.6  | 6.8            | 1.230 (1.390–1.560)  |
| Divorced, widowed, unmarried     | 37.8               | 42.3 | 42.1 | 41.5 | 41.1           | 1.022 (1.000–1.044)  |
| Lives alone                      | 27.3               | 29.8 | 29.1 | 28.1 | 27.9           | 0.999 (0.977–1.021)  |
| Metropolitan living status       | 48.4               | 44.8 | 70.6 | 77.5 | 87.3           | 1.508 (1.294–1.758)  |
| Socioeconomic status, %          |                    |      |      |      |                |                      |
| Did not complete high school     | 34.1               | 41.8 | 43.5 | 41.3 | 40.2           | 1.040 (1.010–1.070)  |
| Low income (<\$5000/y)           | 5.9                | 6.2  | 7.5  | 5.8  | 6.8            | 1.036 (0.987–1.087)  |
| High income (>\$25 000/y)        | 28.1               | 23.9 | 27.2 | 24.2 | 26.8           | 0.989 (0.955–1.024)  |
| Insurance type                   |                    |      |      |      |                |                      |
| Medicare only                    | 11.0               | 10.1 | 11.6 | 11.4 | 11.5           | 1.032 (0.994–1.072)  |
| Medicare and Medicaid            | 11.0               | 11.2 | 16.2 | 10.7 | 14.1           | 1.068 (1.035–1.102)  |
| Medicare and self-purchased      | 38.2               | 37.7 | 36.7 | 34.3 | 31.5           | 0.939 (0.911–0.968)  |
| Medicare and employer sponsored  | 39.7               | 41.0 | 35.5 | 43.6 | 42.9           | 1.016 (0.982–1.052)  |
| Self-reported health, %          |                    |      |      |      |                |                      |
| Excellent                        | 18.9               | 16.0 | 18.0 | 18.9 | 17.0           | 0.984 (0.957–1.011)  |
| Very good                        | 29.8               | 26.8 | 24.3 | 26.1 | 24.6           | 0.952 (0.934–0.970)  |
| Good                             | 30.7               | 31.1 | 27.9 | 29.2 | 31.3           | 1.000 (0.980–1.020)  |
| Fair or poor                     | 20.6               | 26.1 | 29.8 | 25.8 | 27.1           | 1.064 (1.038–1.091)  |
| Smoking, %                       |                    |      |      |      |                |                      |
| Never                            | 44.6               | 43.3 | 44.2 | 42.5 | 42.5           | 0.982 (0.958–1.007)  |
| Current                          | 13.5               | 13.6 | 14.3 | 14.5 | 13.7           | 1.005 (0.977–1.033)  |
| Functional status                |                    |      |      |      |                |                      |
| Other limitation, %              | 55.4               | 58.8 | 60.8 | 57.2 | 55.5           | 0.997 (0.974–1.021)  |
| ADL limitation, %                | 32.0               | 33.8 | 33.3 | 31.8 | 33.1           | 1.007 (0.986–1.029)  |
| IADL limitation, %               | 38.4               | 41.8 | 44.4 | 40.4 | 40.0           | 1.011 (0.989–1.035)  |
| Bedridden, %                     | 2.7                | 2.9  | 2.8  | 3.0  | 3.1            | 1.020 (0.969–1.074)  |
| Facility dwelling, %             | 5.8                | 6.0  | 5.1  | 4.2  | 4.7            | 0.948 (0.917–0.979)  |
| Mean HALex score                 | 62.5               | 59.7 | 59.0 | 61.3 | 60.7           |                      |
| Chronic conditions reported, %   |                    |      |      |      |                |                      |
| Alzheimer disease                | 4.1                | 3.9  | 3.8  | 3.8  | 3.8            | 0.985 (0.946–1.025)  |
| Arthritis                        | 47.8               | 50.5 | 52.0 | 48.4 | 46.7           | 0.988 (0.972–1.006)  |
| Cancer                           | 18.0               | 16.6 | 16.5 | 16.4 | 17.6           | 0.990 (0.968–1.013)  |
| Ischemic heart disease or angina | 12.7               | 14.2 | 14.7 | 14.1 | 14.1           | 1.022 (0.998–1.047)  |
| Diabetes                         | 12.6               | 14.6 | 15.7 | 18.0 | 15.6           | 1.049 (1.026–1.073)  |
| COPD                             | 13.2               | 12.0 | 14.1 | 13.4 | 11.2           | 0.977 (0.948–1.007)  |
| Hypertension                     | 49.5               | 48.6 | 48.9 | 52.0 | 48.8           | 1.004 (0.982–1.026)  |
| History of MI                    | 12.6               | 14.3 | 14.3 | 15.1 | 13.8           | 1.019 (0.997–1.041)  |
| Osteoporosis                     | 9.1                | 8.8  | 9.5  | 8.7  | 8.0            | 0.974 (0.946–1.002)  |
| Parkinson disease                | 1.9                | 1.7  | 1.7  | 1.3  | 1.6            | 0.958 (0.897–1.024)  |
| Stroke                           | 10.4               | 11.7 | 11.5 | 10.8 | 9.9            | 0.982 (0.957–1.008)  |

\* ADL = activity of daily living; COPD = chronic obstructive pulmonary disease; EOL-EI = End-of-Life Expenditure Index; HALex = Health Activities and Limitations Index; IADL = independent activity of daily living; MI = myocardial infarction.

† Odds ratio for \$1000 change in EOL-EI.

Appendix Table 5. Summary of Variables Used in Cohort Analyses\*

| Independent Variable                       | Class of Dependent Variables Used in the Model† |             |          |                 |                       |                      |
|--------------------------------------------|-------------------------------------------------|-------------|----------|-----------------|-----------------------|----------------------|
|                                            | Predicted Mortality                             | Utilization | Survival | Content of Care | Change in HALex Score | Satisfaction Indices |
| Hip fracture cohort                        |                                                 |             |          |                 |                       |                      |
| Demographic characteristics                | X                                               | X           | X        | X               | NA                    | NA                   |
| ZIP code–level variables                   | X                                               | X           | X        | X               |                       |                      |
| Disease burden                             | X                                               | X           | X        | X               |                       |                      |
| Hospital characteristics                   | –                                               | –           | X        | –               |                       |                      |
| Variables ascertained at the HRR level     | –                                               | –           | X        | –               |                       |                      |
| Colorectal cancer cohort                   |                                                 |             |          |                 |                       |                      |
| Demographic characteristics                | X                                               | X           | X        | X               | NA                    | NA                   |
| ZIP code–level variables                   | X                                               | X           | X        | X               |                       |                      |
| Disease burden                             | X                                               | X           | X        | X               |                       |                      |
| Hospital characteristics                   | –                                               | –           | X        | –               |                       |                      |
| Variables ascertained at the HRR level     | –                                               | –           | X        | –               |                       |                      |
| Acute MI cohort                            |                                                 |             |          |                 |                       |                      |
| Demographic characteristics                | X                                               | X           | X        | X               | NA                    | NA                   |
| Comorbid conditions and other risk factors | X                                               | X           | X        | X               |                       |                      |
| MI location                                | X                                               | X           | X        | X               |                       |                      |
| Presentation and preadmission status       | X                                               | X           | X        | X               |                       |                      |
| ZIP code–level variables                   | –                                               | –           | X        | –               |                       |                      |
| Hospital characteristics                   | –                                               | –           | X        | –               |                       |                      |
| Variables ascertained at the HRR level     | –                                               | –           | X        | –               |                       |                      |
| MCBS cohort                                |                                                 |             |          |                 |                       |                      |
| Demographic characteristics                | X                                               | X           | X        | NA              | X                     | X                    |
| Income status                              | –                                               | X           | X        |                 | X                     | X                    |
| Self-reported health                       | X                                               | X           | X        |                 | –                     | X                    |
| Marital status                             | X                                               | X           | X        |                 | X                     | –                    |
| Smoking and functional status              | X                                               | X           | X        |                 | X‡                    | –                    |
| Chronic conditions reported                | X                                               | X           | X        |                 | X                     | –                    |
| Educational background                     | X                                               | X           | X        |                 | X                     | X                    |
| Insurance status§                          | –                                               | –           | –        |                 | X                     | X                    |
| Metropolitan region                        | –                                               | –           | –        |                 | X                     | X                    |
| Hispanic origin                            | –                                               | –           | –        |                 | –                     | X                    |

\* HALex = Health Activities and Limitations Index; HRR = hospital referral region; MCBS = Medicare Current Beneficiary Survey; MI = myocardial infarction; NA = analysis not run.

† See Appendix Tables 6 through 9 for the full set of variables included in each category.

‡ Activities of daily living and independent activities of daily living were not included in the model because they are used to create the outcome.

§ Medicare only, Medicare and Medicaid, Medicare and self-purchased insurance, or Medicare and employer-provided insurance.

Appendix Table 6. Survival Model for the Hip Fracture Cohort\*

| Variable                                                     | Hazard Ratio (95% CI) | Standard Error | Chi-Square Test | P Value |
|--------------------------------------------------------------|-----------------------|----------------|-----------------|---------|
| <b>Demographic characteristics</b>                           |                       |                |                 |         |
| Age 65–69 y, white man (excluded)                            | 1.000                 |                |                 |         |
| Age 65–69 y, black man                                       | 1.225 (1.107–1.355)   | 0.063          | 3.9             | <0.001  |
| Age 65–69 y, white woman                                     | 0.694 (0.667–0.723)   | 0.014          | –17.8           | <0.001  |
| Age 65–69 y, black woman                                     | 0.851 (0.763–0.949)   | 0.047          | –2.9            | <0.001  |
| Age 70–74 y, white man                                       | 1.288 (1.239–1.339)   | 0.025          | 12.8            | <0.001  |
| Age 70–74 y, black man                                       | 1.448 (1.315–1.595)   | 0.071          | 7.5             | <0.001  |
| Age 70–74 y, white woman                                     | 0.826 (0.797–0.856)   | 0.015          | –10.5           | <0.001  |
| Age 70–74 y, black woman                                     | 1.027 (0.948–1.112)   | 0.042          | 0.7             | >0.2    |
| Age 75–79 y, white man                                       | 1.687 (1.627–1.749)   | 0.031          | 28.3            | <0.001  |
| Age 75–79 y, black man                                       | 1.883 (1.729–2.051)   | 0.082          | 14.5            | <0.001  |
| Age 75–79 y, white woman                                     | 1.013 (0.979–1.048)   | 0.018          | 0.7             | >0.2    |
| Age 75–79 y, black woman                                     | 1.162 (1.086–1.245)   | 0.041          | 4.3             | <0.001  |
| Age 80–84 y, white man                                       | 2.192 (2.117–2.270)   | 0.039          | 44.2            | <0.001  |
| Age 80–84 y, black man                                       | 2.320 (2.156–2.498)   | 0.087          | 22.4            | <0.001  |
| Age 80–84 y, white woman                                     | 1.305 (1.262–1.349)   | 0.022          | 15.7            | <0.001  |
| Age 80–84 y, black woman                                     | 1.348 (1.273–1.427)   | 0.039          | 10.3            | <0.001  |
| Age ≥85 y, white man                                         | 3.209 (3.102–3.320)   | 0.056          | 67.2            | <0.001  |
| Age ≥85 y, black man                                         | 3.041 (2.850–3.245)   | 0.101          | 33.6            | <0.001  |
| Age ≥85 y, white woman                                       | 2.018 (1.953–2.085)   | 0.033          | 42.3            | <0.001  |
| Age ≥85 y, black woman                                       | 1.957 (1.866–2.053)   | 0.048          | 27.6            | <0.001  |
| <b>ZIP code-level variables</b>                              |                       |                |                 |         |
| Proportion below the poverty level                           | 0.999 (0.998–1.000)   | 0.000          | –2.2            | 0.028   |
| Proportion with less than a high school education            | 1.001 (1.000–1.002)   | 0.000          | 3.0             | 0.002   |
| Proportion with a high school or college education           | 1.002 (1.001–1.002)   | 0.000          | 5.2             | <0.001  |
| Proportion of people ≥65 y of age living in a nursing home   | 1.002 (1.001–1.003)   | 0.000          | 6.3             | <0.001  |
| Proportion residing in a rural area                          | 1.000 (0.999–1.000)   | 0.000          | –3.6            | <0.001  |
| Proportion residing in an urban area                         | 1.000 (1.000–1.000)   | 0.000          | 3.0             | 0.003   |
| Proportion Hispanic                                          | 0.998 (0.998–0.999)   | 0.000          | –6.2            | <0.001  |
| Proportion single                                            | 1.000 (1.000–1.001)   | 0.000          | 0.3             | >0.2    |
| Proportion employed                                          | 1.001 (1.000–1.002)   | 0.000          | 2.7             | 0.006   |
| Proportion of people ≥65 y of age with a working disability  | 1.002 (1.001–1.003)   | 0.000          | 3.9             | <0.001  |
| Proportion of people ≥65 y of age with self-care limitation  | 1.000 (0.998–1.001)   | 0.001          | –0.3            | >0.2    |
| Proportion of people ≥65 y of age with a mobility limitation | 1.000 (0.999–1.002)   | 0.001          | 0.6             | >0.2    |
| <b>Social Security income‡</b>                               |                       |                |                 |         |
| <\$1700 (reference)                                          | 1.000                 |                |                 |         |
| \$1700–\$2099                                                | 0.993 (0.981–1.005)   | 0.006          | –1.2            | >0.2    |
| \$2100–\$2600                                                | 0.979 (0.967–0.991)   | 0.006          | –3.3            | 0.001   |
| >\$2600                                                      | 0.967 (0.952–0.982)   | 0.008          | –4.2            | <0.001  |
| <b>Comorbid conditions§</b>                                  |                       |                |                 |         |
| 0 (excluded)                                                 | 1.000                 |                |                 |         |
| 1                                                            | 1.579 (1.566–1.593)   | 0.007          | 104.6           | <0.001  |
| 2                                                            | 1.965 (1.939–1.990)   | 0.013          | 102.0           | <0.001  |
| 3                                                            | 2.512 (2.455–2.571)   | 0.030          | 78.4            | <0.001  |
| 4                                                            | 3.263 (3.122–3.409)   | 0.073          | 52.8            | <0.001  |
| ≥5                                                           | 5.034 (4.887–5.186)   | 0.076          | 106.7           | <0.001  |
| <b>Hospital characteristics</b>                              |                       |                |                 |         |
| Nonteaching (excluded)                                       | 1.000                 |                |                 |         |
| Minor teaching                                               | 0.999 (0.986–1.012)   | 0.007          | –0.2            | >0.2    |
| Major teaching                                               | 1.017 (1.003–1.032)   | 0.007          | 2.4             | 0.016   |
| <b>Lowest volume (excluded)</b>                              |                       |                |                 |         |
| Low volume                                                   | 0.959 (0.944–0.974)   | 0.008          | –5.3            | <0.001  |
| Medium volume                                                | 0.946 (0.931–0.961)   | 0.008          | –6.9            | <0.001  |
| High volume                                                  | 0.919 (0.902–0.936)   | 0.009          | –8.9            | <0.001  |
| <b>Variables ascertained at HRR level</b>                    |                       |                |                 |         |
| <b>HRR residents in an HMO</b>                               |                       |                |                 |         |
| <1%                                                          | 1.000                 |                |                 |         |
| 1%–<5%                                                       | 1.010 (0.996–1.024)   | 0.007          | 1.4             | 0.154   |
| 5%–<15%                                                      | 1.017 (1.003–1.032)   | 0.007          | 2.4             | 0.019   |
| ≥15%                                                         | 1.032 (1.014–1.050)   | 0.009          | 3.6             | <0.001  |
| <b>Region of residence</b>                                   |                       |                |                 |         |
| New England (excluded)                                       | 1.000                 |                |                 |         |
| Mid-Atlantic                                                 | 0.998 (0.975–1.021)   | 0.012          | –0.2            | >0.2    |
| South Atlantic                                               | 1.052 (1.028–1.076)   | 0.012          | 4.4             | <0.001  |
| Great Lakes                                                  | 1.056 (1.033–1.079)   | 0.012          | 4.9             | <0.001  |
| East South Central                                           | 1.054 (1.026–1.084)   | 0.015          | 3.8             | <0.001  |
| Great Plains                                                 | 1.044 (1.019–1.071)   | 0.013          | 3.4             | 0.001   |
| West South Central                                           | 1.077 (1.050–1.105)   | 0.014          | 5.7             | <0.001  |
| Mountain                                                     | 1.080 (1.048–1.114)   | 0.017          | 5.0             | <0.001  |
| Pacific                                                      | 1.075 (1.047–1.103)   | 0.014          | 5.4             | <0.001  |
| Log of total EOL-EI                                          | 1.028 (0.990–1.068)   | 0.020          | 1.4             | 0.155   |

\* Cox regression and the Breslow method were used for ties. Number of observations = 614 503; number of failures = 295 612; time at risk = 516 799 100 days; Wald chi-square test = 71 731.18; probability > chi-square test = 0.0000; log likelihood = –3 765 818.2. EOL-EI = End-of-Life Expenditure Index; HMO = health maintenance organization; HRR = hospital referral region.

† Adjusted for clustering by hospital.

‡ Monthly income of ZIP code of residence.

§ Based on the Charlson Comorbidity Index.

Appendix Table 7. Survival Model for the Colorectal Cancer Cohort\*

| Variable                                                     | Hazard Ratio (95% CI) | Standard Error | Chi-Square Test | P Value |
|--------------------------------------------------------------|-----------------------|----------------|-----------------|---------|
| <b>Demographic characteristics</b>                           |                       |                |                 |         |
| Age 65–69 y, white man (excluded)                            | 1.000                 |                |                 |         |
| Age 65–69 y, black man                                       | 1.200 (1.105–1.302)   | 0.050          | 4.3             | <0.001  |
| Age 65–69 y, white woman                                     | 0.893 (0.862–0.926)   | 0.016          | –6.2            | <0.001  |
| Age 65–69 y, black woman                                     | 1.030 (0.951–1.117)   | 0.042          | 0.7             | >0.2    |
| Age 70–74 y, white man                                       | 1.129 (1.094–1.164)   | 0.018          | 7.6             | <0.001  |
| Age 70–74 y, black man                                       | 1.422 (1.320–1.533)   | 0.054          | 9.3             | <0.001  |
| Age 70–74 y, white woman                                     | 1.022 (0.990–1.055)   | 0.017          | 1.3             | 0.183   |
| Age 70–74 y, black woman                                     | 1.188 (1.101–1.281)   | 0.046          | 4.4             | <0.001  |
| Age 75–79 y, white man                                       | 1.398 (1.354–1.442)   | 0.023          | 20.7            | <0.001  |
| Age 75–79 y, black man                                       | 1.670 (1.529–1.824)   | 0.075          | 11.4            | <0.001  |
| Age 75–79 y, white woman                                     | 1.236 (1.199–1.275)   | 0.019          | 13.5            | <0.001  |
| Age 75–79 y, black woman                                     | 1.380 (1.283–1.483)   | 0.051          | 8.7             | <0.001  |
| Age 80–84 y, white man                                       | 1.852 (1.791–1.916)   | 0.032          | 36.1            | <0.001  |
| Age 80–84 y, black man                                       | 2.108 (1.907–2.330)   | 0.108          | 14.6            | <0.001  |
| Age 80–84 y, white woman                                     | 1.528 (1.480–1.577)   | 0.025          | 26.3            | <0.001  |
| Age 80–84 y, black woman                                     | 1.698 (1.570–1.835)   | 0.068          | 13.3            | <0.001  |
| Age ≥85 y, white man                                         | 2.706 (2.607–2.808)   | 0.051          | 52.6            | <0.001  |
| Age ≥85 y, black man                                         | 2.779 (2.456–3.144)   | 0.175          | 16.2            | <0.001  |
| Age ≥85 y, white woman                                       | 2.208 (2.138–2.279)   | 0.036          | 48.4            | <0.001  |
| Age ≥85 y, black woman                                       | 2.501 (2.300–2.720)   | 0.107          | 21.5            | <0.001  |
| <b>ZIP code-level variables</b>                              |                       |                |                 |         |
| Proportion below the poverty level                           | 0.998 (0.997–1.000)   | 0.001          | –1.8            | 0.068   |
| Proportion with less than a high school education            | 1.003 (1.002–1.005)   | 0.001          | 5.2             | <0.001  |
| Proportion with a high school or college education           | 1.002 (1.000–1.003)   | 0.001          | 2.7             | 0.007   |
| Proportion of people ≥65 y of age living in a nursing home   | 1.000 (0.999–1.001)   | 0.001          | –0.1            | >0.2    |
| Proportion residing in rural areas                           | 1.000 (0.999–1.000)   | 0.000          | –1.9            | 0.052   |
| Proportion residing in urban areas                           | 1.000 (1.000–1.000)   | 0.000          | –0.3            | >0.2    |
| Proportion Hispanic                                          | 1.000 (0.999–1.001)   | 0.000          | 0.1             | >0.2    |
| Proportion single                                            | 1.001 (1.000–1.002)   | 0.001          | 2.1             | 0.036   |
| Proportion employed                                          | 1.001 (1.000–1.002)   | 0.001          | 1.7             | 0.092   |
| Proportion of people ≥65 y of age with a working disability  | 1.003 (1.002–1.005)   | 0.001          | 3.7             | <0.001  |
| Proportion of people ≥65 y of age with self-care limitation  | 0.999 (0.996–1.002)   | 0.001          | –0.7            | >0.2    |
| Proportion of people ≥65 y of age with a mobility limitation | 1.001 (0.998–1.004)   | 0.001          | 0.7             | >0.2    |
| <b>Social Security income†</b>                               |                       |                |                 |         |
| <\$1700 (excluded)                                           | 1.000                 |                |                 |         |
| \$1700–\$2099                                                | 0.982 (0.959–1.006)   | 0.012          | –1.5            | 0.135   |
| \$2100–\$2600                                                | 0.975 (0.952–1.000)   | 0.012          | –2.0            | 0.047   |
| >\$2600                                                      | 0.970 (0.942–0.999)   | 0.015          | –2.0            | 0.044   |
| <b>Disease burden</b>                                        |                       |                |                 |         |
| Local or regional cancer (excluded)                          | 1.000                 |                |                 |         |
| Distant cancer                                               | 3.716 (3.636–3.797)   | 0.041          | 118.3           | <0.001  |
| <b>Comorbid conditions‡</b>                                  |                       |                |                 |         |
| 0 (excluded)                                                 | 1.000                 |                |                 |         |
| 1                                                            | 1.203 (1.184–1.223)   | 0.010          | 22.2            | <0.001  |
| 2                                                            | 1.374 (1.336–1.412)   | 0.020          | 22.3            | <0.001  |
| 3                                                            | 1.753 (1.665–1.846)   | 0.046          | 21.3            | <0.001  |
| 4                                                            | 1.872 (1.650–2.124)   | 0.121          | 9.7             | <0.001  |
| ≥5                                                           | 2.499 (1.890–3.305)   | 0.356          | 6.4             | <0.001  |
| <b>Hospital characteristics</b>                              |                       |                |                 |         |
| Nonteaching (excluded)                                       | 1.000                 |                |                 |         |
| Minor teaching                                               | 1.041 (1.012–1.071)   | 0.015          | 2.8             | 0.006   |
| Major teaching                                               | 0.996 (0.969–1.025)   | 0.014          | –0.3            | >0.2    |
| <b>Lowest volume (excluded)</b>                              |                       |                |                 |         |
| Low volume                                                   | 0.917 (0.893–0.941)   | 0.012          | –6.6            | <0.001  |
| Medium volume                                                | 0.870 (0.846–0.893)   | 0.012          | –10.2           | <0.001  |
| High volume                                                  | 0.802 (0.773–0.833)   | 0.015          | –11.5           | <0.001  |
| <b>Variables ascertained at HRR level</b>                    |                       |                |                 |         |
| HRR residents in an HMO                                      |                       |                |                 |         |
| <1% (excluded)                                               | 1.000                 |                |                 |         |
| 1%–<5%                                                       | 1.008 (0.981–1.036)   | 0.014          | 0.6             | >0.2    |
| 5%–<15%                                                      | 1.011 (0.982–1.041)   | 0.015          | 0.7             | >0.2    |
| ≥15%                                                         | 1.002 (0.966–1.040)   | 0.019          | 0.1             | >0.2    |
| <b>Region of residence</b>                                   |                       |                |                 |         |
| New England (excluded)                                       | 1.000                 |                |                 |         |
| Mid-Atlantic                                                 | 1.016 (0.972–1.063)   | 0.023          | 0.7             | >0.2    |
| South Atlantic                                               | 0.950 (0.908–0.992)   | 0.021          | –2.3            | 0.022   |
| Great Lakes                                                  | 1.021 (0.980–1.064)   | 0.022          | 1.0             | >0.2    |
| East South Central                                           | 0.975 (0.921–1.033)   | 0.028          | –0.9            | >0.2    |
| Great Plains                                                 | 0.953 (0.908–0.999)   | 0.023          | –2.0            | 0.047   |
| West South Central                                           | 0.984 (0.936–1.033)   | 0.025          | –0.7            | >0.2    |
| Mountain                                                     | 1.045 (0.986–1.108)   | 0.031          | 1.5             | 0.137   |
| Pacific                                                      | 0.949 (0.901–1.000)   | 0.025          | –2.0            | 0.050   |
| Log of total EOL-EI                                          | 1.128 (1.044–1.219)   | 0.044          | 3.1             | 0.002   |

\* Cox regression and the Breslow method were used for ties. Number of observations = 195 429; number of failures = 85 599; time at risk = 174 733 470 days; Wald chi-square test = 21 913.16; probability > chi-square test = 0.0000; log likelihood = –991 748.48. EOL-EI = End-of-Life Expenditure Index; HMO = health maintenance organization; HRR = hospital referral region.

† Adjusted for clustering by hospital.

‡ Monthly income of ZIP code of residence.

§ Based on the Charlson Comorbidity Index.

Appendix Table 8. Survival Model for the Acute Myocardial Infarction Cohort\*

| Variable                                   | Hazard Ratio (95% CI) | Standard Error† | Chi-Square Test | P Value |
|--------------------------------------------|-----------------------|-----------------|-----------------|---------|
| Demographic characteristics                |                       |                 |                 |         |
| Age 65–69 y, white man (excluded)          | 1.000                 |                 |                 |         |
| Age 65–69 y, black man                     | 1.221 (1.108–1.346)   | 0.061           | 4.0             | <0.001  |
| Age 65–69 y, white woman                   | 1.113 (1.064–1.163)   | 0.025           | 4.7             | <0.001  |
| Age 65–69 y, black woman                   | 1.297 (1.177–1.429)   | 0.064           | 5.3             | <0.001  |
| Age 70–74 y, white man                     | 1.337 (1.290–1.386)   | 0.024           | 15.9            | <0.001  |
| Age 70–74 y, black man                     | 1.414 (1.247–1.604)   | 0.091           | 5.4             | <0.001  |
| Age 70–74 y, white woman                   | 1.366 (1.314–1.420)   | 0.027           | 15.8            | <0.001  |
| Age 70–74 y, black woman                   | 1.425 (1.299–1.564)   | 0.068           | 7.5             | <0.001  |
| Age 75–79 y, white man                     | 1.806 (1.742–1.872)   | 0.033           | 32.3            | <0.001  |
| Age 75–79 y, black man                     | 1.748 (1.577–1.939)   | 0.092           | 10.6            | <0.001  |
| Age 75–79 y, white woman                   | 1.716 (1.653–1.782)   | 0.033           | 28.3            | <0.001  |
| Age 75–79 y, black woman                   | 1.616 (1.476–1.769)   | 0.075           | 10.4            | <0.001  |
| Age 80–84 y, white man                     | 2.419 (2.332–2.510)   | 0.045           | 47.1            | <0.001  |
| Age 80–84 y, black man                     | 2.112 (1.872–2.383)   | 0.130           | 12.1            | <0.001  |
| Age 80–84 y, white woman                   | 2.184 (2.105–2.266)   | 0.041           | 41.8            | <0.001  |
| Age 80–84 y, black woman                   | 2.131 (1.949–2.329)   | 0.097           | 16.7            | <0.001  |
| Age ≥85 y, white man                       | 3.258 (3.130–3.391)   | 0.067           | 57.6            | <0.001  |
| Age ≥85 y, black man                       | 2.566 (2.243–2.935)   | 0.176           | 13.7            | <0.001  |
| Age ≥85 y, white woman                     | 2.874 (2.769–2.983)   | 0.054           | 55.7            | <0.001  |
| Age ≥85 y, black woman                     | 2.490 (2.273–2.728)   | 0.116           | 19.6            | <0.001  |
| Comorbid conditions and other risk factors |                       |                 |                 |         |
| Previous revascularization                 | 1.072 (1.050–1.095)   | 0.011           | 6.5             | <0.001  |
| Previous MI                                | 1.128 (1.109–1.148)   | 0.010           | 13.6            | <0.001  |
| History of congestive heart failure        | 1.378 (1.352–1.405)   | 0.013           | 32.9            | <0.001  |
| History of dementia                        | 1.320 (1.282–1.360)   | 0.020           | 18.5            | <0.001  |
| History of diabetes                        | 1.294 (1.273–1.316)   | 0.011           | 30.6            | <0.001  |
| History of hypertension                    | 0.970 (0.955–0.986)   | 0.008           | –3.7            | <0.001  |
| History of leukemia                        | 1.516 (1.386–1.657)   | 0.069           | 9.1             | <0.001  |
| History of low ejection fraction           | 1.249 (1.208–1.292)   | 0.021           | 13.0            | <0.001  |
| History of metastatic cancer               | 3.069 (2.891–3.258)   | 0.093           | 36.8            | <0.001  |
| History of nonmetastatic cancer            | 1.604 (1.513–1.700)   | 0.048           | 15.9            | <0.001  |
| Peripheral vascular disease                | 1.296 (1.267–1.326)   | 0.015           | 22.4            | <0.001  |
| COPD                                       | 1.244 (1.221–1.268)   | 0.012           | 22.5            | <0.001  |
| History of angina                          | 0.962 (0.947–0.978)   | 0.008           | –4.6            | <0.001  |
| History of angina missing                  | 0.929 (0.890–0.971)   | 0.021           | –3.3            | 0.001   |
| Terminal illness                           | 1.438 (1.297–1.596)   | 0.076           | 6.9             | <0.001  |
| Smoker                                     | 1.058 (1.034–1.083)   | 0.012           | 4.8             | <0.001  |
| Characteristics of MI                      |                       |                 |                 |         |
| Non-Q-wave (excluded)                      | 1.000                 |                 |                 |         |
| Anterior                                   | 1.187 (1.166–1.210)   | 0.011           | 18.2            | <0.001  |
| Inferior                                   | 0.907 (0.886–0.929)   | 0.011           | –8.0            | <0.001  |
| Other                                      | 1.215 (1.184–1.248)   | 0.016           | 14.6            | <0.001  |
| Fibrillation                               | 1.179 (1.150–1.208)   | 0.015           | 13.2            | <0.001  |
| Received CPR                               | 1.888 (1.803–1.977)   | 0.044           | 27.0            | <0.001  |
| Heart block                                | 1.198 (1.174–1.222)   | 0.012           | 17.7            | <0.001  |
| Congestive heart failure                   | 1.540 (1.513–1.567)   | 0.014           | 48.5            | <0.001  |
| Hypotension                                | 1.763 (1.688–1.842)   | 0.039           | 25.4            | <0.001  |
| Admission blood pressure missing           | 1.919 (1.709–2.156)   | 0.114           | 11.0            | <0.001  |
| Shock                                      | 1.891 (1.787–2.000)   | 0.054           | 22.2            | <0.001  |
| Peak creatine kinase level missing         | 1.289 (1.198–1.387)   | 0.048           | 6.8             | <0.001  |
| Peak creatine kinase level >1000 IU/L      | 1.275 (1.253–1.299)   | 0.012           | 26.5            | <0.001  |
| Transferred from emergency department      | 0.892 (0.850–0.937)   | 0.022           | –4.6            | <0.001  |
| Transferred from the hospital              | 0.881 (0.848–0.915)   | 0.017           | –6.6            | <0.001  |
| Preadmission status                        |                       |                 |                 |         |
| Admitted from nursing home                 | 1.322 (1.281–1.364)   | 0.021           | 17.3            | <0.001  |
| Admitted from other institution            | 1.177 (1.118–1.238)   | 0.030           | 6.3             | <0.001  |
| Unable to walk                             | 1.760 (1.690–1.832)   | 0.036           | 27.3            | <0.001  |
| Needed assistance to walk                  | 1.319 (1.292–1.346)   | 0.014           | 26.7            | <0.001  |
| Ambulatory status missing                  | 2.150 (2.054–2.249)   | 0.050           | 33.1            | <0.001  |
| ZIP code-level variables                   |                       |                 |                 |         |
| Social Security income‡                    |                       |                 |                 |         |
| <\$1700 (excluded)                         | 1.000                 |                 |                 |         |
| \$1700–\$2099                              | 1.028 (1.003–1.054)   | 0.013           | 2.2             | 0.030   |
| \$2100–\$2600                              | 1.026 (1.002–1.051)   | 0.012           | 2.2             | 0.032   |
| >\$2600                                    | 1.027 (1.003–1.052)   | 0.013           | 2.2             | 0.028   |
| Hospital characteristics                   |                       |                 |                 |         |
| Nonteaching (excluded)                     | 1.000                 |                 |                 |         |

Continued on following page

Appendix Table 8—Continued

| Variable                           | Hazard Ratio (95% CI) | Standard Error† | Chi-Square Test | P Value |
|------------------------------------|-----------------------|-----------------|-----------------|---------|
| Minor teaching                     | 0.999 (0.975–1.024)   | 0.013           | −0.1            | >0.2    |
| Major teaching                     | 1.000 (0.977–1.024)   | 0.012           | 0.0             | >0.2    |
| Lowest volume (excluded)           | 1.000                 |                 |                 |         |
| Low volume                         | 0.957 (0.935–0.979)   | 0.011           | −3.8            | <0.001  |
| Medium volume                      | 0.930 (0.908–0.953)   | 0.012           | −5.8            | <0.001  |
| High volume                        | 0.897 (0.874–0.922)   | 0.012           | −7.9            | <0.001  |
| Variables ascertained at HRR level |                       |                 |                 |         |
| HRR residents in an HMO            |                       |                 |                 |         |
| <1% (excluded)                     | 1.000                 |                 |                 |         |
| 1%–<5%                             | 0.994 (0.970–1.019)   | 0.013           | −0.5            | >0.2    |
| 5%–<15%                            | 0.979 (0.954–1.005)   | 0.013           | −1.6            | 0.114   |
| ≥15%                               | 0.976 (0.947–1.006)   | 0.015           | −1.6            | 0.116   |
| Region of residence                |                       |                 |                 |         |
| New England (excluded)             | 1.000                 |                 |                 |         |
| Mid-Atlantic                       | 1.083 (1.043–1.125)   | 0.021           | 4.2             | <0.001  |
| South Atlantic                     | 1.078 (1.038–1.120)   | 0.021           | 3.9             | <0.001  |
| Great Lakes                        | 1.070 (1.033–1.109)   | 0.019           | 3.8             | <0.001  |
| East South Central                 | 1.128 (1.071–1.188)   | 0.030           | 4.6             | <0.001  |
| Great Plains                       | 1.060 (1.011–1.111)   | 0.025           | 2.4             | 0.015   |
| West South Central                 | 1.157 (1.110–1.205)   | 0.024           | 6.9             | <0.001  |
| Mountain                           | 1.049 (0.996–1.106)   | 0.028           | 1.8             | 0.071   |
| Pacific                            | 1.107 (1.055–1.161)   | 0.027           | 4.1             | <0.001  |
| Log of total EOL-EI                | 1.076 (1.006–1.151)   | 0.037           | 2.1             | 0.032   |

\* Cox regression and the Breslow method were used for ties. Number of observations = 159 393; number of failures = 71 787; time at risk = 114 399 525 days; Wald chi-square test = 35 204.56; probability > chi-square < 0.0001; log likelihood = −815 726.21. COPD = chronic obstructive pulmonary disease; CPR = cardiopulmonary resuscitation; EOL-EI = End-of-Life Expenditure Index; HMO = health maintenance organization; HRR = hospital referral region; MI = myocardial infarction.

† Adjusted for clustering by hospital.

‡ Monthly income of ZIP code of residence.

**Appendix Table 9. Survival Model for the Medicare Beneficiary Survey Cohort\***

| Variable                           | Hazard Ratio (95% CI) |
|------------------------------------|-----------------------|
| <b>Demographic characteristics</b> |                       |
| Age 65–69 y, white man (excluded)  | 1.00                  |
| Age 65–69 y, black man             | 1.18 (0.88–1.57)      |
| Age 65–69 y, white woman           | 0.53 (0.43–0.65)      |
| Age 65–69 y, black woman           | 0.48 (0.32–0.72)      |
| Age 70–74 y, white man             | 1.45 (1.23–1.70)      |
| Age 70–74 y, black man             | 1.89 (1.40–2.54)      |
| Age 70–74 y, white woman           | 0.89 (0.75–1.05)      |
| Age 70–74 y, black woman           | 0.79 (0.54–1.16)      |
| Age 75–79 y, white man             | 2.02 (1.73–2.35)      |
| Age 75–79 y, black man             | 2.22 (1.45–3.40)      |
| Age 75–79 y, white woman           | 1.34 (1.14–1.57)      |
| Age 75–79 y, black woman           | 1.27 (0.97–1.65)      |
| Age 80–84 y, white man             | 3.11 (2.71–3.58)      |
| Age 80–84 y, black man             | 2.58 (1.98–3.35)      |
| Age 80–84 y, white woman           | 1.95 (1.67–2.28)      |
| Age 80–84 y, black woman           | 2.01 (1.47–2.76)      |
| Age ≥85 y, white man               | 4.45 (3.82–5.19)      |
| Age ≥85 y, black man               | 4.43 (3.18–6.17)      |
| Age ≥85 y, white woman             | 3.24 (2.80–3.74)      |
| Age ≥85 y, black woman             | 3.07 (2.38–3.97)      |
| <b>Marital status</b>              |                       |
| Married                            | 0.88 (0.82–0.94)      |
| <b>Educational background</b>      |                       |
| College (excluded)                 | 1.00                  |
| Did not complete high school       | 0.95 (0.88–1.03)      |
| High school                        | 1.06 (0.97–1.16)      |
| <b>Income status</b>               |                       |
| >\$25 000/y (excluded)             | 1.00                  |
| <\$10 000/y                        | 1.20 (1.06–1.37)      |
| \$10 000–\$15 000/y                | 1.17 (1.06–1.30)      |
| \$15 000–\$25 000/y                | 1.16 (1.06–1.27)      |
| Information missing                | 1.23 (1.09–1.39)      |
| <b>Self-reported health</b>        |                       |
| Excellent (excluded)               | 1.00                  |
| Very good                          | 1.18 (1.05–1.34)      |
| Good                               | 1.39 (1.24–1.56)      |
| Fair                               | 1.74 (1.53–1.97)      |
| Poor                               | 2.36 (2.05–2.72)      |
| <b>Smoking</b>                     |                       |
| Never (excluded)                   | 1.00                  |
| Former smoker                      | 1.38 (1.27–1.49)      |
| Current smoker                     | 1.75 (1.58–1.93)      |
| <b>Functional status</b>           |                       |
| <b>ADL limitations</b>             |                       |
| 0 (excluded)                       | 1.00                  |
| 0–1                                | 1.38 (1.26–1.52)      |
| 1–2                                | 1.60 (1.43–1.79)      |
| 2–4                                | 1.73 (1.54–1.95)      |
| 4–5                                | 2.17 (1.84–2.57)      |
| 5–6                                | 2.95 (2.53–3.44)      |
| <b>IADL limitations</b>            |                       |
| 0 (excluded)                       | 1.00                  |
| 0–≤3                               | 1.00 (0.92–1.09)      |
| 3–6                                | 1.24 (1.12–1.38)      |
| Other limitation                   | 1.20 (1.06–1.36)      |
| Bedridden                          | 1.19 (1.05–1.35)      |
| Facility-dwelling                  | 1.44 (1.25–1.65)      |
| <b>Chronic conditions reported</b> |                       |
| Alzheimer disease                  | 1.18 (1.05–1.32)      |
| Arthritis                          | 0.75 (0.70–0.80)      |
| Cancer                             | 1.28 (1.18–1.39)      |
| Ischemic heart disease or angina   | 1.02 (0.93–1.11)      |
| Diabetes                           | 1.34 (1.24–1.44)      |
| COPD                               | 1.19 (1.08–1.31)      |
| Hypertension                       | 1.00 (0.94–1.05)      |
| History of MI                      | 1.33 (1.22–1.44)      |
| Osteoporosis                       | 0.97 (0.89–1.06)      |
| Parkinson disease                  | 1.37 (1.16–1.62)      |
| Stroke                             | 1.19 (1.10–1.29)      |
| Log of total EOL-EI                | 1.12 (0.93–1.34)      |

\* Number of observations read = 23 902; weighted count = 23 902; denominator degrees of freedom = 728;  $-2 \times$  normalized log-likelihood with  $\beta(s) = 89\ 696.39$ ;  $-2 \times$  normalized log-likelihood full model = 84 651.09; approximate chi-square value ( $-2 \times \log$ -1 ratio) = 5045.30; approximate  $P$  value = 0.00; variance estimation method Taylor series (with replacement). ADL = activity of daily living; COPD = chronic obstructive pulmonary disease; EOL-EI = End-of-Life Expenditure Index; IADL = independent activity of daily living; MI = myocardial infarction.

**Appendix Table 10. Models Testing the Association between the End-of-Life Expenditure Index and Change in Scores on the Health Activities and Limitations Index\***

| Variable                           | Adjusted Change in HALEx Scores<br>in Models Based on Quintiles<br>of EOL-EI |         |         | Adjusted Change in HALEx Scores<br>in Models with EOL-EI as a<br>Continuous Variable |         |         | Final Model† |
|------------------------------------|------------------------------------------------------------------------------|---------|---------|--------------------------------------------------------------------------------------|---------|---------|--------------|
|                                    | Model A                                                                      | Model B | Model C | Model A                                                                              | Model B | Model C |              |
| Intercept                          | 96.96                                                                        | 78.23   | 98.01   | 100.43                                                                               | 79.87   | 101.57  |              |
| Year                               | -1.91                                                                        | -0.80   | -2.40   | -2.77                                                                                | -1.38   | -3.29   |              |
| Intensity (continuous)             |                                                                              |         |         | -0.38                                                                                | -0.24   | -0.39   |              |
| Year × intensity                   |                                                                              |         |         | 0.06                                                                                 | 0.04    | 0.06    |              |
| Quintile 1                         |                                                                              |         |         |                                                                                      |         |         | 1.65         |
| Quintile 2                         | -1.47                                                                        | -2.52   | -1.37   |                                                                                      |         |         | 0.56         |
| Quintile 3                         | -1.33                                                                        | -2.03   | -1.16   |                                                                                      |         |         | 0.90         |
| Quintile 4                         | -0.74                                                                        | -0.66   | -0.66   |                                                                                      |         |         | 1.26         |
| Quintile 5                         | -1.77                                                                        | -1.15   | -1.78   |                                                                                      |         |         | ref          |
| YR × quintile 1                    |                                                                              |         |         |                                                                                      |         |         | -1.96        |
| YR × quintile 2                    | -0.20                                                                        | -0.08   | -0.25   |                                                                                      |         |         | -2.18        |
| YR × quintile 3                    | -0.38                                                                        | -0.44   | -0.47   |                                                                                      |         |         | -2.28        |
| YR × quintile 4                    | 0.00                                                                         | -0.09   | -0.03   |                                                                                      |         |         | -1.94        |
| YR × quintile 5                    | -0.21                                                                        | -0.26   | -0.21   |                                                                                      |         |         | -1.96        |
| Age 65–69 y, white man (reference) |                                                                              |         |         |                                                                                      |         |         | 95.10        |
| Age 65–69 y, white woman           | -3.42                                                                        | -6.90   | -3.42   | -3.42                                                                                | -6.89   | -3.42   | 94.48        |
| Age 65–69 y, black man             | -0.58                                                                        | -9.61   | -0.56   | -0.53                                                                                | -9.40   | -0.51   | 91.69        |
| Age 65–69 y, black woman           | -4.65                                                                        | -14.31  | -4.65   | -4.65                                                                                | -14.10  | -4.65   | 90.39        |
| Age 70–74 y, white man             | -2.81                                                                        | -2.48   | -2.81   | -2.82                                                                                | -2.49   | -2.82   | 92.31        |
| Age 70–74 y, white woman           | -4.71                                                                        | -6.88   | -4.72   | -4.75                                                                                | -6.92   | -4.76   | 87.44        |
| Age 70–74 y, black man             | -7.60                                                                        | -6.16   | -7.60   | -7.71                                                                                | -6.14   | -7.71   | 90.39        |
| Age 70–74 y, black woman           | -8.13                                                                        | -22.34  | -8.13   | -8.32                                                                                | -22.41  | -8.32   | 86.91        |
| Age 75–79 y, white man             | -7.36                                                                        | -9.07   | -7.37   | -7.35                                                                                | -9.06   | -7.36   | 87.73        |
| Age 75–79 y, white woman           | -10.02                                                                       | -12.82  | -10.03  | -10.04                                                                               | -12.79  | -10.04  | 89.18        |
| Age 75–79 y, black man             | -5.84                                                                        | -16.39  | -5.88   | -5.77                                                                                | -16.17  | -5.81   | 85.08        |
| Age 75–79 y, black woman           | -12.05                                                                       | -20.38  | -12.06  | -12.03                                                                               | -20.25  | -12.04  | 83.00        |
| Age 80–84 y, white man             | -11.42                                                                       | -10.73  | -11.42  | -11.41                                                                               | -10.75  | -11.42  | 83.70        |
| Age 80–84 y, white woman           | -15.65                                                                       | -21.27  | -15.66  | -15.67                                                                               | -21.32  | -15.68  | 89.84        |
| Age 80–84 y, black man             | -5.16                                                                        | -12.24  | -5.12   | -5.31                                                                                | -12.27  | -5.27   | 79.45        |
| Age 80–84 y, black woman           | -14.04                                                                       | -24.16  | -14.05  | -14.10                                                                               | -24.08  | -14.11  | 81.03        |
| Age ≥85 y, white man               | -19.04                                                                       | -14.67  | -19.06  | -19.07                                                                               | -14.72  | -19.09  | 76.07        |
| Age ≥85 y, white woman             | -21.46                                                                       | -28.54  | -21.46  | -21.51                                                                               | -28.61  | -21.51  | 79.37        |
| Age ≥85 y, black man               | -15.66                                                                       | -17.86  | -15.67  | -15.71                                                                               | -17.92  | -15.72  | 73.63        |
| Age ≥85 y, black woman             | -18.67                                                                       | -31.43  | -18.67  | -18.73                                                                               | -31.49  | -18.73  | 76.31        |
| Arthritis                          | -9.37                                                                        |         | -11.24  | -9.41                                                                                |         | -11.27  | -9.38        |
| Alzheimer disease                  | -6.47                                                                        |         | -1.03   | -6.40                                                                                |         | -1.01   | -6.43        |
| Cancer                             | -5.79                                                                        |         | -4.35   | -5.78                                                                                |         | -4.35   | -5.79        |
| Angina or CAD                      | -5.04                                                                        |         | -6.22   | -5.07                                                                                |         | -6.21   | -5.06        |
| Diabetes                           | -9.97                                                                        |         | -8.62   | -9.91                                                                                |         | -8.58   | -9.95        |
| Obstructive lung disease           | -10.25                                                                       |         | -11.45  | -10.22                                                                               |         | -11.43  | -10.24       |
| Hypertension                       | -5.06                                                                        |         | -5.73   | -5.02                                                                                |         | -5.69   | -5.06        |
| History of MI                      | -6.30                                                                        |         | -6.83   | -6.30                                                                                |         | -6.81   | -6.30        |
| Osteoporosis                       | -9.06                                                                        |         | -10.73  | -9.04                                                                                |         | -10.72  | -9.05        |
| Parkinson disease                  | -15.31                                                                       |         | -10.34  | -15.28                                                                               |         | -10.35  | -15.30       |
| History of stroke                  | -10.77                                                                       |         | -9.73   | -10.83                                                                               |         | -9.77   | -10.77       |
| Current smoker                     | -5.29                                                                        |         | -5.29   | -5.31                                                                                |         | -5.31   | -5.30        |
| Former smoker                      | -1.90                                                                        |         | -1.89   | -1.90                                                                                |         | -1.90   | -1.90        |
| Bedridden                          | -14.70                                                                       |         | -14.79  | -14.67                                                                               |         | -14.75  | -14.72       |
| Facility resident                  | -15.86                                                                       |         | -15.88  | -15.94                                                                               |         | -15.95  | -15.85       |
| Metropolitan area resident         | 1.71                                                                         |         | 1.72    | 1.79                                                                                 |         | 1.80    | 1.60         |
| Medicare only (reference)          |                                                                              |         |         |                                                                                      |         |         |              |
| Medicare and Medicaid              | -5.07                                                                        |         | -5.08   | -5.11                                                                                |         | -5.12   | -5.11        |
| Medicare and self-purchased        | 2.93                                                                         |         | 2.92    | 2.90                                                                                 |         | 2.89    | 2.95         |
| Medicare and employer sponsored    | 2.99                                                                         |         | 3.00    | 2.94                                                                                 |         | 2.94    | 2.99         |
| At least some college (reference)  |                                                                              |         |         |                                                                                      |         |         |              |
| Completed high school              | -2.39                                                                        |         | -2.37   | -2.43                                                                                |         | -2.42   | -2.38        |
| Did not complete high school       | -6.14                                                                        |         | -6.13   | -6.22                                                                                |         | -6.21   | -6.16        |
| Income >\$25 000/y (reference)     |                                                                              |         |         |                                                                                      |         |         |              |
| Income \$15 000–\$25 000/y         | -3.71                                                                        |         | -3.71   | -3.65                                                                                |         | -3.65   | -3.69        |
| Income \$5000–\$15 000/y           | -6.35                                                                        |         | -6.34   | -6.33                                                                                |         | -6.33   | -6.33        |
| Income <\$5000/y                   | -5.69                                                                        |         | -5.71   | -5.67                                                                                |         | -5.69   | -5.66        |
| Married                            | 0.05                                                                         |         | 0.05    | 0.06                                                                                 |         | 0.05    | 0.07         |
| YR × age 65–69 y, white woman      |                                                                              | 0.26    |         |                                                                                      | 0.26    |         |              |

Continued on following page

Appendix Table 10—Continued

| Variable                      | Adjusted Change in HALex Scores<br>in Models Based on Quintiles<br>of EOL-EI |         |         | Adjusted Change in HALex Scores<br>in Models with EOL-EI as a<br>Continuous Variable |         |         | Final Model† |
|-------------------------------|------------------------------------------------------------------------------|---------|---------|--------------------------------------------------------------------------------------|---------|---------|--------------|
|                               | Model A                                                                      | Model B | Model C | Model A                                                                              | Model B | Model C |              |
| YR × age 65–69 y, black man   |                                                                              | 0.63    |         |                                                                                      | 0.57    |         |              |
| YR × age 65–69 y, black woman |                                                                              | 0.20    |         |                                                                                      | 0.12    |         |              |
| YR × age 70–74 y, white man   |                                                                              | –1.24   |         |                                                                                      | –1.23   |         |              |
| YR × age 70–74 y, white woman |                                                                              | –0.68   |         |                                                                                      | –0.68   |         |              |
| YR × age 70–74 y, black man   |                                                                              | –4.74   |         |                                                                                      | –4.81   |         |              |
| YR × age 70–74 y, black woman |                                                                              | 0.33    |         |                                                                                      | 0.22    |         |              |
| YR × age 75–79 y, white man   |                                                                              | –1.25   |         |                                                                                      | –1.25   |         |              |
| YR × age 75–79 y, white woman |                                                                              | –1.57   |         |                                                                                      | –1.59   |         |              |
| YR × age 75–79 y, black man   |                                                                              | –0.66   |         |                                                                                      | –0.73   |         |              |
| YR × age 75–79 y, black woman |                                                                              | –2.94   |         |                                                                                      | –2.99   |         |              |
| YR × age 80–84 y, white man   |                                                                              | –2.78   |         |                                                                                      | –2.77   |         |              |
| YR × age 80–84 y, white woman |                                                                              | –1.98   |         |                                                                                      | –1.98   |         |              |
| YR × age 80–84 y, black man   |                                                                              | –1.97   |         |                                                                                      | –2.06   |         |              |
| YR × age 80–84 y, black woman |                                                                              | –2.30   |         |                                                                                      | –2.39   |         |              |
| YR × age ≥85 y, white man     |                                                                              | –6.00   |         |                                                                                      | –6.00   |         |              |
| YR × age ≥85 y, white woman   |                                                                              | –3.72   |         |                                                                                      | –3.72   |         |              |
| YR × age ≥85 y, black man     |                                                                              | –4.56   |         |                                                                                      | –4.63   |         |              |
| YR × age ≥85 y, black woman   |                                                                              | –2.49   |         |                                                                                      | –2.54   |         |              |
| YR × arthritis                |                                                                              |         | 0.88    |                                                                                      |         |         | 0.87         |
| YR × Alzheimer disease        |                                                                              |         | –2.78   |                                                                                      |         |         | –2.75        |
| YR × cancer                   |                                                                              |         | –0.68   |                                                                                      |         |         | –0.67        |
| YR × angina or CAD            |                                                                              |         | 0.55    |                                                                                      |         |         | 0.53         |
| YR × diabetes                 |                                                                              |         | –0.64   |                                                                                      |         |         | –0.63        |
| YR × obstructive lung disease |                                                                              |         | 0.56    |                                                                                      |         |         | 0.57         |
| YR × hypertension             |                                                                              |         | 0.32    |                                                                                      |         |         | 0.31         |
| YR × history of MI            |                                                                              |         | 0.25    |                                                                                      |         |         | 0.24         |
| YR × osteoporosis             |                                                                              |         | 0.80    |                                                                                      |         |         | 0.80         |
| YR × Parkinson disease        |                                                                              |         | –2.43   |                                                                                      |         |         | –2.41        |
| YR × history of stroke        |                                                                              |         | –0.49   |                                                                                      |         |         | –0.50        |

\* The dependent variable (HALex score) can range from 0 to 100. Nonsignificant comparisons ( $P > 0.05$ ) are shaded in gray. The variables YR × quintile and YR × intensity test whether the change in HALex score over time differs across quintiles of EOL-EI or across all levels of EOL-EI. Three models are presented for each of the different measures of EOL-EI (by quintile, and continuous). The main model (model A) includes main effects for potential confounders, while models B and C include additional interactions between YR and each of the other major classes of variables. CAD = coronary artery disease; EOL-EI = End-of-Life Expenditure Index; HALex = Health Activities and Limitations Index; MI = myocardial infarction; YR = year.

† Used to estimate average annual change in HALex scores shown in Part 1, Table 4.

Appendix Table 11. Specific Services Provided to Chronic Disease Cohorts during First Year of Follow-up\*

| Service                                      | Cohort-Specific Rates (per 1000) in Quintile 1 unless Otherwise Specified |                          |                 | Pooled Ratio of Rate in Specified Quintile Compared with Quintile 1 |            |            |            |
|----------------------------------------------|---------------------------------------------------------------------------|--------------------------|-----------------|---------------------------------------------------------------------|------------|------------|------------|
|                                              | Hip Fracture Cohort                                                       | Colorectal Cancer Cohort | Acute MI Cohort | Quintile 2                                                          | Quintile 3 | Quintile 4 | Quintile 5 |
| Preventive care, %                           |                                                                           |                          |                 |                                                                     |            |            |            |
| Influenza vaccine                            | 22.2                                                                      | 35.3                     | 32.4            | 1.0                                                                 | 1.0        | 1.0        | 0.9        |
| Pneumonia vaccine                            | 2.7                                                                       | 4.6                      | 5.2             | 1.0                                                                 | 1.0        | 0.9        | 0.9        |
| Mammography (among women age 65–69 y)        | 18.3                                                                      | 26.1                     | 19.1            | 0.9                                                                 | 0.9        | 1.0        | 1.0        |
| Eye examination (among diabetic persons)     | 27.2                                                                      | 31.8                     | 26.8            | 1.0                                                                 | 1.0        | 1.1        | 1.2        |
| Lipid panel (among diabetic persons)         | 11.8                                                                      | 15.8                     | 19.3            | 1.3                                                                 | 1.4        | 1.6        | 2.2        |
| Evaluation and management†                   |                                                                           |                          |                 |                                                                     |            |            |            |
| Office visits per person                     | 4.9                                                                       | 12.7                     | 9.3             | 1.1                                                                 | 1.0        | 1.1        | 1.3        |
| Inpatient visits per person                  | 13.0                                                                      | 11.7                     | 21.0            | 1.3                                                                 | 1.6        | 1.8        | 2.3        |
| Initial inpatient consultations per person   | 1.5                                                                       | 1.4                      | 1.8             | 1.3                                                                 | 1.5        | 1.8        | 2.5        |
| Psychotherapy visits per person              | 0.8                                                                       | 0.2                      | 0.3             | 1.2                                                                 | 1.3        | 2.0        | 3.4        |
| Mean different MDs seen, <i>n</i>            | 5.2                                                                       | 4.9                      | 6.0             | 1.1                                                                 | 1.2        | 1.2        | 1.5        |
| Seeing >10 MDs, %                            | 9.6                                                                       | 9.6                      | 16.4            | 1.4                                                                 | 1.5        | 1.7        | 2.7        |
| Endoscopic procedures                        |                                                                           |                          |                 |                                                                     |            |            |            |
| Laryngoscopy                                 | 5.1                                                                       | 9.2                      | 12.3            | 1.3                                                                 | 1.4        | 1.8        | 3.4        |
| Bronchoscopy                                 | 11.7                                                                      | 18.4                     | 26.1            | 1.2                                                                 | 1.4        | 1.7        | 1.9        |
| Cystoscopy                                   | 38.6                                                                      | 103.6                    | 53.1            | 1.1                                                                 | 1.2        | 1.2        | 1.4        |
| Imaging tests                                |                                                                           |                          |                 |                                                                     |            |            |            |
| Chest radiography                            | 3529.7                                                                    | 3936.5                   | 7180.4          | 1.2                                                                 | 1.3        | 1.4        | 1.6        |
| CT or MRI of head or brain                   | 210.6                                                                     | 159.9                    | 237.9           | 1.3                                                                 | 1.5        | 1.6        | 1.8        |
| CT or MRI of lumbar spine                    | 9.1                                                                       | 16.8                     | 11.9            | 1.0                                                                 | 1.2        | 1.3        | 1.5        |
| Bone scan                                    | 64.6                                                                      | 77.5                     | 33.4            | 1.2                                                                 | 1.3        | 1.5        | 1.7        |
| Ventilation–perfusion scan                   | 54.5                                                                      | 51.1                     | 60.6            | 1.2                                                                 | 1.2        | 1.6        | 1.7        |
| Minor or diagnostic procedures               |                                                                           |                          |                 |                                                                     |            |            |            |
| Repair of laceration                         | 50.5                                                                      | 29.1                     | 25.2            | 1.0                                                                 | 1.0        | 1.2        | 1.1        |
| Excision or repair of malignant lesion       | 27.4                                                                      | 41.1                     | 35.1            | 1.1                                                                 | 1.1        | 1.3        | 1.4        |
| Skin biopsy                                  | 225.2                                                                     | 209.8                    | 221.3           | 1.1                                                                 | 1.2        | 1.4        | 2.2        |
| Breast biopsy                                | 3.7                                                                       | 7.8                      | 4.0             | 1.0                                                                 | 0.9        | 1.0        | 0.9        |
| Pulmonary function test                      | 34.5                                                                      | 61.2                     | 120.8           | 1.1                                                                 | 1.3        | 1.6        | 2.8        |
| Holter monitor                               | 25.8                                                                      | 25.4                     | 98.3            | 1.5                                                                 | 1.8        | 2.3        | 3.9        |
| Diagnostic upper-GI endoscopy                | 54.7                                                                      | 122.8                    | 76.0            | 1.2                                                                 | 1.4        | 1.6        | 1.6        |
| Electroencephalography                       | 29.5                                                                      | 21.1                     | 44.8            | 1.6                                                                 | 2.0        | 2.4        | 3.0        |
| Major procedures                             |                                                                           |                          |                 |                                                                     |            |            |            |
| Cataract removal                             | 48.2                                                                      | 50.7                     | 50.4            | 1.0                                                                 | 1.0        | 1.0        | 0.9        |
| Back surgery                                 | 1.4                                                                       | 1.4                      | 2.2             | 1.0                                                                 | 1.0        | 1.2        | 0.9        |
| Total knee arthroplasty                      | 6.3                                                                       | 2.4                      | 2.9             | 1.0                                                                 | 0.9        | 0.9        | 0.8        |
| End-of-life care‡                            |                                                                           |                          |                 |                                                                     |            |            |            |
| Inpatient days during last 6 months of life§ | 20.6                                                                      | 26.1                     | 20.0            | 1.2                                                                 | 1.3        | 1.4        | 1.8        |
| ICU days during last 6 months of life§       | 1.9                                                                       | 3.6                      | 7.6             | 1.3                                                                 | 1.6        | 1.8        | 2.2        |
| Vena cava filter                             | 2.1                                                                       | 5.2                      | 2.3             | 1.4                                                                 | 1.8        | 2.4        | 3.7        |
| Emergency intubation                         | 31.0                                                                      | 39.8                     | 133.3           | 1.3                                                                 | 1.5        | 1.8        | 2.6        |
| Feeding tube placement                       | 44.8                                                                      | 55.4                     | 25.5            | 1.7                                                                 | 2.0        | 2.4        | 2.9        |

\* Rates are shown per 1000 person-years of follow-up after index admission, except as indicated. CT = computed tomography; GI = gastrointestinal; ICU = intensive care unit; MI = myocardial infarction; MRI = magnetic resonance imaging.

† Rates were calculated per person-year of follow-up after index admission.

‡ Rates were calculated only for those who died.

§ Rate per person who died.

|| Rate per 1000 deaths.

**Appendix Table 12. Unadjusted Utilization Rates of Hospital and Physician Services, by Specified Subgroups of the Hip Fracture Cohort\***

| Variable                                                          | Quintile of EOL-EI |      |      |      |                | Ratio of Quintile 5 to Quintile 1 |
|-------------------------------------------------------------------|--------------------|------|------|------|----------------|-----------------------------------|
|                                                                   | 1<br>(Lowest)      | 2    | 3    | 4    | 5<br>(Highest) |                                   |
| Utilization during the first 6 months of follow-up                |                    |      |      |      |                |                                   |
| Demographic characteristics                                       |                    |      |      |      |                |                                   |
| Age <80 y                                                         | 12.6               | 13.3 | 13.6 | 14.6 | 15.1           | 1.2                               |
| Age ≥80 y                                                         | 12.1               | 12.6 | 13.0 | 13.8 | 14.9           | 1.2                               |
| Man                                                               | 12.5               | 13.5 | 14.1 | 15.3 | 16.0           | 1.3                               |
| Woman                                                             | 12.1               | 12.7 | 13.0 | 13.8 | 14.7           | 1.2                               |
| Nonblack race                                                     | 12.2               | 12.9 | 13.2 | 14.0 | 14.8           | 1.2                               |
| Black race                                                        | 13.9               | 13.6 | 13.5 | 15.5 | 18.1           | 1.3                               |
| Social Security incomet                                           |                    |      |      |      |                |                                   |
| <\$1700                                                           | 12.4               | 12.8 | 13.5 | 14.0 | 15.3           | 1.2                               |
| \$1700–\$2099                                                     | 12.2               | 13.1 | 13.3 | 14.0 | 14.9           | 1.2                               |
| \$2100–\$2600                                                     | 12.2               | 12.8 | 13.1 | 14.0 | 15.0           | 1.2                               |
| >\$2600                                                           | 12.1               | 12.8 | 13.0 | 14.2 | 14.8           | 1.2                               |
| Variables ascertained at HRR level                                |                    |      |      |      |                |                                   |
| HRR residents in an HMO                                           |                    |      |      |      |                |                                   |
| <5%                                                               | 12.1               | 12.8 | 13.1 | 14.0 | 14.8           | 1.2                               |
| ≥5%                                                               | 12.4               | 13.0 | 13.4 | 14.2 | 15.0           | 1.2                               |
| Region of residence                                               |                    |      |      |      |                |                                   |
| 2, 3, 4†                                                          | 12.4               | 12.9 | 12.9 | 14.2 | 15.0           | 1.2                               |
| Other                                                             | 12.2               | 12.8 | 13.4 | 14.0 | 14.8           | 1.2                               |
| Predicted mortality risk§                                         |                    |      |      |      |                |                                   |
| Low                                                               | 12.3               | 12.8 | 12.9 | 13.8 | 14.6           | 1.2                               |
| Intermediate                                                      | 12.0               | 12.8 | 13.0 | 13.7 | 14.6           | 1.2                               |
| High                                                              | 12.4               | 13.1 | 13.6 | 14.8 | 15.7           | 1.3                               |
| Utilization (per person per year) during all subsequent follow-up |                    |      |      |      |                |                                   |
| Demographic characteristics                                       |                    |      |      |      |                |                                   |
| Age <80 y                                                         | 4.8                | 6.1  | 6.9  | 7.5  | 7.8            | 1.6                               |
| Age ≥80 y                                                         | 3.6                | 4.5  | 5.3  | 6.4  | 6.7            | 1.9                               |
| Man                                                               | 4.9                | 6.1  | 6.6  | 8.6  | 8.6            | 1.7                               |
| Woman                                                             | 3.7                | 4.8  | 5.6  | 6.3  | 6.6            | 1.8                               |
| Nonblack race                                                     | 4.0                | 5.0  | 5.8  | 6.7  | 6.8            | 1.7                               |
| Black race                                                        | 5.3                | 6.3  | 6.9  | 8.2  | 11.6           | 2.2                               |
| Social Security incomet                                           |                    |      |      |      |                |                                   |
| <\$1700                                                           | 4.1                | 4.9  | 6.2  | 7.0  | 7.2            | 1.7                               |
| \$1700–\$2099                                                     | 4.2                | 5.1  | 6.3  | 6.5  | 7.2            | 1.7                               |
| \$2100–\$2600                                                     | 4.0                | 5.1  | 5.7  | 7.0  | 6.8            | 1.7                               |
| >\$2600                                                           | 3.8                | 5.1  | 5.2  | 6.6  | 7.1            | 1.9                               |
| Variables ascertained at HRR level                                |                    |      |      |      |                |                                   |
| HRR residents in an HMO                                           |                    |      |      |      |                |                                   |
| <5%                                                               | 4.0                | 5.1  | 6.0  | 6.6  | 7.8            | 2.0                               |
| ≥5%                                                               | 4.0                | 4.7  | 5.5  | 6.9  | 6.9            | 1.7                               |
| Region of residence                                               |                    |      |      |      |                |                                   |
| 2, 3, 4†                                                          | 4.6                | 5.4  | 6.0  | 6.8  | 7.1            | 1.6                               |
| Other                                                             | 3.8                | 4.5  | 5.8  | 6.8  | 6.7            | 1.8                               |
| Predicted mortality risk§                                         |                    |      |      |      |                |                                   |
| Low                                                               | 4.2                | 5.0  | 6.0  | 6.3  | 6.6            | 1.6                               |
| Intermediate                                                      | 3.6                | 5.0  | 5.5  | 6.6  | 6.7            | 1.8                               |
| High                                                              | 4.2                | 5.1  | 6.0  | 7.4  | 8.0            | 1.9                               |

\* Values are in thousands of dollars. EOL-EI = End-of-Life Expenditure Index; HMO = health maintenance organization; HRR = hospital referral region.

† Monthly income of ZIP code of residence.

‡ Mid-Atlantic, South Atlantic, and Great Lakes Regions.

§ Based on logistic regression models used for determining average predicted risk for death.

**Appendix Table 13. Unadjusted Utilization Rates of Hospital and Physician Services, by Specified Subgroups of the Colorectal Cancer Cohort\***

| Variable                                                          | Quintile of EOL-EI |      |      |      |                | Ratio of Quintile 1 to Quintile 5 |
|-------------------------------------------------------------------|--------------------|------|------|------|----------------|-----------------------------------|
|                                                                   | 1<br>(Lowest)      | 2    | 3    | 4    | 5<br>(Highest) |                                   |
| Utilization during the first 6 months of follow-up                |                    |      |      |      |                |                                   |
| Demographic characteristics                                       |                    |      |      |      |                |                                   |
| Age <80 y                                                         | 19.2               | 19.4 | 19.7 | 20.5 | 21.8           | 1.1                               |
| Age ≥80 y                                                         | 18.9               | 19.1 | 19.2 | 19.8 | 20.8           | 1.1                               |
| Man                                                               | 19.6               | 19.5 | 19.7 | 20.6 | 22.2           | 1.1                               |
| Woman                                                             | 18.6               | 19.1 | 19.5 | 20.0 | 20.9           | 1.1                               |
| Nonblack race                                                     | 19.1               | 19.4 | 19.6 | 20.3 | 21.3           | 1.1                               |
| Black race                                                        | 19.5               | 18.6 | 19.6 | 19.8 | 22.9           | 1.2                               |
| Social Security incomet                                           |                    |      |      |      |                |                                   |
| <\$1700                                                           | 19.3               | 18.5 | 19.2 | 20.3 | 21.7           | 1.1                               |
| \$1700–\$2099                                                     | 19.3               | 19.6 | 19.0 | 20.4 | 20.5           | 1.1                               |
| \$2100–\$2600                                                     | 19.1               | 19.5 | 19.9 | 19.7 | 21.5           | 1.1                               |
| >\$2600                                                           | 18.6               | 19.3 | 19.9 | 20.5 | 21.7           | 1.2                               |
| Variables ascertained at HRR level                                |                    |      |      |      |                |                                   |
| HRR residents in an HMO                                           |                    |      |      |      |                |                                   |
| <5%                                                               | 19.1               | 19.3 | 19.6 | 20.3 | 21.4           | 1.1                               |
| ≥5%                                                               | 19.1               | 19.3 | 19.6 | 20.2 | 21.5           | 1.1                               |
| Region of residence                                               |                    |      |      |      |                |                                   |
| 2, 3, 4‡                                                          | 19.4               | 19.4 | 19.5 | 20.4 | 21.4           | 1.1                               |
| Other                                                             | 18.9               | 19.1 | 19.6 | 20.1 | 21.8           | 1.2                               |
| Predicted mortality risk‡                                         |                    |      |      |      |                |                                   |
| Low                                                               | 18.6               | 18.3 | 18.5 | 19.5 | 21.2           | 1.1                               |
| Intermediate                                                      | 19.2               | 19.3 | 19.8 | 20.2 | 21.3           | 1.1                               |
| High                                                              | 19.5               | 20.3 | 20.4 | 21.0 | 22.0           | 1.1                               |
| Utilization (per person per year) during all subsequent follow-up |                    |      |      |      |                |                                   |
| Demographic characteristics                                       |                    |      |      |      |                |                                   |
| Age <80 y                                                         | 6.3                | 7.4  | 8.6  | 8.7  | 8.9            | 1.4                               |
| Age ≥80 y                                                         | 5.3                | 5.8  | 6.5  | 6.9  | 9.2            | 1.7                               |
| Man                                                               | 6.1                | 7.7  | 8.4  | 9.2  | 9.7            | 1.6                               |
| Woman                                                             | 5.9                | 6.3  | 7.5  | 7.1  | 8.4            | 1.4                               |
| Nonblack race                                                     | 6.0                | 6.9  | 7.9  | 8.0  | 8.9            | 1.5                               |
| Black race                                                        | 7.6                | 6.5  | 7.7  | 8.5  | 10.0           | 1.3                               |
| Social Security incomet                                           |                    |      |      |      |                |                                   |
| <\$1700                                                           | 5.6                | 5.8  | 8.4  | 7.5  | 10.0           | 1.8                               |
| \$1700–\$2099                                                     | 6.3                | 7.6  | 7.8  | 8.9  | 9.0            | 1.4                               |
| \$2100–\$2600                                                     | 5.5                | 7.5  | 8.0  | 7.8  | 8.4            | 1.5                               |
| >\$2600                                                           | 6.6                | 6.3  | 7.7  | 8.3  | 8.9            | 1.3                               |
| Variables ascertained at the HRR level                            |                    |      |      |      |                |                                   |
| HRR residents in an HMO                                           |                    |      |      |      |                |                                   |
| <5%                                                               | 6.3                | 7.2  | 7.9  | 8.4  | 9.0            | 1.4                               |
| ≥5%                                                               | 5.5                | 5.9  | 7.9  | 7.8  | 9.0            | 1.6                               |
| Region of residence                                               |                    |      |      |      |                |                                   |
| 2, 3, 4‡                                                          | 6.6                | 7.3  | 8.2  | 8.3  | 9.1            | 1.4                               |
| Other                                                             | 5.7                | 6.2  | 7.8  | 7.9  | 8.4            | 1.5                               |
| Predicted mortality risk§                                         |                    |      |      |      |                |                                   |
| Low                                                               | 5.7                | 7.1  | 7.4  | 7.4  | 7.8            | 1.4                               |
| Intermediate                                                      | 6.2                | 6.6  | 7.6  | 8.2  | 9.5            | 1.5                               |
| High                                                              | 6.0                | 7.0  | 8.9  | 8.7  | 9.7            | 1.6                               |

\* Values are in thousands of dollars. EOL-EI = End-of-Life Expenditure Index; HMO = health maintenance organization; HRR = hospital referral region.

† Monthly income of ZIP code of residence.

‡ Mid-Atlantic, South Atlantic, and Great Lakes Regions.

§ Based on logistic regression models used for determining average predicted risk for death.

**Appendix Table 14. Unadjusted Utilization Rates of Hospital and Physician Services, by Specified Subgroups of the Acute Myocardial Infarction Cohort\***

| Variable                                                          | Quintile of EOL-EI |      |      |      |                | Ratio of Quintile 5 to Quintile 1 |
|-------------------------------------------------------------------|--------------------|------|------|------|----------------|-----------------------------------|
|                                                                   | 1<br>(Lowest)      | 2    | 3    | 4    | 5<br>(Highest) |                                   |
| Utilization during the first 6 months of follow-up                |                    |      |      |      |                |                                   |
| Demographic characteristics                                       |                    |      |      |      |                |                                   |
| Age <80 y                                                         | 20.0               | 21.1 | 21.5 | 22.1 | 23.7           | 1.2                               |
| Age ≥80 y                                                         | 13.1               | 13.5 | 14.9 | 15.4 | 15.3           | 1.2                               |
| Man                                                               | 18.6               | 19.5 | 20.1 | 20.7 | 22.1           | 1.2                               |
| Woman                                                             | 16.9               | 17.7 | 18.4 | 19.1 | 18.9           | 1.1                               |
| Nonblack race                                                     | 17.8               | 18.7 | 19.3 | 20.1 | 20.8           | 1.2                               |
| Black race                                                        | 15.1               | 15.3 | 19.1 | 17.6 | 17.9           | 1.2                               |
| Social Security incomet                                           |                    |      |      |      |                |                                   |
| <\$1700                                                           | 17.4               | 18.5 | 20.0 | 20.0 | 20.4           | 1.2                               |
| \$1700–\$2099                                                     | 18.6               | 18.1 | 18.5 | 18.8 | 21.1           | 1.1                               |
| \$2100–\$2600                                                     | 17.0               | 19.3 | 19.0 | 20.4 | 20.9           | 1.2                               |
| >\$2600                                                           | 18.5               | 18.3 | 19.8 | 20.2 | 20.3           | 1.1                               |
| Variables ascertained at HRR level                                |                    |      |      |      |                |                                   |
| HRR residents in an HMO                                           |                    |      |      |      |                |                                   |
| <5%                                                               | 17.6               | 18.6 | 18.8 | 19.8 | 19.9           | 1.1                               |
| ≥5%                                                               | 18.2               | 18.7 | 20.3 | 20.0 | 20.7           | 1.1                               |
| Region of residence                                               |                    |      |      |      |                |                                   |
| 2, 3, 4‡                                                          | 17.9               | 18.4 | 20.1 | 19.7 | 20.7           | 1.2                               |
| Other                                                             | 17.8               | 19.1 | 18.8 | 20.1 | 19.7           | 1.1                               |
| Predicted mortality risk§                                         |                    |      |      |      |                |                                   |
| Low                                                               | 20.3               | 21.5 | 22.2 | 21.8 | 24.0           | 1.2                               |
| Intermediate                                                      | 17.7               | 18.8 | 20.6 | 21.3 | 21.7           | 1.2                               |
| High                                                              | 14.7               | 15.6 | 14.7 | 16.4 | 16.5           | 1.1                               |
| Utilization (per person per year) during all subsequent follow-up |                    |      |      |      |                |                                   |
| Demographic characteristics                                       |                    |      |      |      |                |                                   |
| Age <80 y                                                         | 5.8                | 6.6  | 7.2  | 7.0  | 8.5            | 1.4                               |
| Age ≥80 y                                                         | 4.3                | 5.4  | 6.4  | 7.4  | 8.2            | 1.9                               |
| Man                                                               | 5.9                | 6.2  | 7.0  | 7.6  | 8.7            | 1.5                               |
| Woman                                                             | 4.8                | 6.3  | 6.9  | 6.7  | 8.0            | 1.7                               |
| Nonblack race                                                     | 5.3                | 6.2  | 6.8  | 7.0  | 8.3            | 1.6                               |
| Black race                                                        | 7.0                | 6.9  | 8.4  | 8.9  | 9.7            | 1.4                               |
| Social Security incomet                                           |                    |      |      |      |                |                                   |
| <\$1700                                                           | 5.3                | 4.7  | 7.3  | 7.0  | 7.5            | 1.4                               |
| \$1700–\$2099                                                     | 5.7                | 6.7  | 6.9  | 9.1  | 8.1            | 1.4                               |
| \$2100–\$2600                                                     | 5.3                | 6.8  | 8.0  | 5.7  | 8.4            | 1.6                               |
| >\$2600                                                           | 5.2                | 6.1  | 5.4  | 6.9  | 8.9            | 1.7                               |
| Variables ascertained at HRR level                                |                    |      |      |      |                |                                   |
| HRR residents in an HMO                                           |                    |      |      |      |                |                                   |
| <5%                                                               | 5.7                | 6.5  | 7.2  | 6.8  | 6.7            | 1.2                               |
| ≥5%                                                               | 4.8                | 5.3  | 6.4  | 7.5  | 8.7            | 1.8                               |
| Region of residence                                               |                    |      |      |      |                |                                   |
| 2, 3, 4‡                                                          | 6.6                | 6.5  | 7.5  | 6.9  | 8.7            | 1.3                               |
| Other                                                             | 4.8                | 5.8  | 6.5  | 7.5  | 6.4            | 1.3                               |
| Predicted mortality risk§                                         |                    |      |      |      |                |                                   |
| Low                                                               | 4.2                | 5.4  | 6.2  | 6.5  | 6.8            | 1.6                               |
| Intermediate                                                      | 6.3                | 7.2  | 7.4  | 7.3  | 9.4            | 1.5                               |
| High                                                              | 5.8                | 6.1  | 7.1  | 7.6  | 8.8            | 1.5                               |

\* Values are in thousands of dollars. EOL-EI = End-of-Life Expenditure Index; HMO = health maintenance organization; HRR = hospital referral region.

† Monthly income of ZIP code of residence.

‡ Mid-Atlantic, South Atlantic, and Great Lakes Regions.

§ Based on logistic regression models used for determining average predicted risk for death.

**Current Author Addresses:** Dr. Fisher, Mr. Gottlieb, and Ms. Pinder: Strassenburgh Hall, HB 7251, Dartmouth Medical School, Hanover, NH 03755.

Drs. Wennberg and Lucas: Maine Medical Center, 22 Bramhall Street, Portland, ME 04102.

Dr. Stukel: Institute for Clinical Evaluative Sciences, 2075 Bayview Avenue, Toronto, Ontario M4N 3M5, Canada.

**Author Contributions:** Conception and design: E.S. Fisher, D.E. Wennberg, T.A. Stukel, É.L. Pinder.

Analysis and interpretation of the data: E.S. Fisher, D.E. Wennberg, T.A. Stukel, D.J. Gottlieb, F.L. Lucas, É.L. Pinder.

Drafting of the article: E.S. Fisher, D.E. Wennberg, T.A. Stukel, D.J. Gottlieb, É.L. Pinder.

Critical revision of the article for important intellectual content: E.S. Fisher, D.E. Wennberg, D.J. Gottlieb, F.L. Lucas.

Final approval of the article: E.S. Fisher, D.E. Wennberg, T.A. Stukel, D.J. Gottlieb, F.L. Lucas, É.L. Pinder.

Statistical expertise: T.A. Stukel, D.J. Gottlieb.

Obtaining of funding: E.S. Fisher.

Administrative, technical, or logistic support: É.L. Pinder.

Collection and assembly of data: E.S. Fisher, D.J. Gottlieb, É.L. Pinder.

## References

1. **Hearst N, Newman TB, Hulley SB.** Delayed effects of the military draft on mortality. A randomized natural experiment. *N Engl J Med.* 1986;314:620-4. [PMID: 3945247]
2. **Marciniak TA, Ellerbeck EF, Radford MJ, Kresowik TF, Gold JA, Krumholz HM, et al.** Improving the quality of care for Medicare patients with acute myocardial infarction: results from the Cooperative Cardiovascular Project. *JAMA.* 1998;279:1351-7. [PMID: 9582042]
3. **O'Connor GT, Quinon HB, Traven ND, Ramunno LD, Dodds TA, Marciniak TA, et al.** Geographic variation in the treatment of acute myocardial infarction: the Cooperative Cardiovascular Project. *JAMA.* 1999;281:627-33. [PMID: 10029124]
4. **Huff ED.** Comprehensive reliability assessment and comparison of quality indicators and their components. *J Clin Epidemiol.* 1997;50:1395-404. [PMID: 9449943]
5. **Fisher ES, Wennberg JE, Stukel TA, Sharp SM.** Hospital readmission rates for cohorts of Medicare beneficiaries in Boston and New Haven. *N Engl J Med.* 1994;331:989-95. [PMID: 8084356]
6. **Mitchell JB, Bubolz T, Paul JE, Pashos CL, Escarce JJ, Muhlbaier LH, et al.** Using Medicare claims for outcomes research. *Med Care.* 1994;32:JS38-51. [PMID: 8028412]
7. **Deyo RA, Cherkin DC, Ciol MA.** Adapting a clinical comorbidity index for use with ICD-9-CM administrative databases. *J Clin Epidemiol.* 1992;45:613-9. [PMID: 1607900]
8. **Cooper GS, Yuan Z, Stange KC, Amini SB, Dennis LK, Rimm AA.** The utility of Medicare claims data for measuring cancer stage. *Med Care.* 1999;37:706-11. [PMID: 10424641]
9. **Adler GS.** A profile of the Medicare Current Beneficiary Survey. *Health Care Financ Rev.* 1994;15:153-63. [PMID: 10138483]
10. **Apodaca R, Judkins D, Lo A, Skellan K.** Sampling from HCFA lists. In: *Proceedings of the Section on Survey Research Methods, American Statistical Association.* Alexandria, VA: American Statistical Assoc; 1992:250-55.
11. **Blustein J.** Medicare coverage, supplemental insurance, and the use of mammography by older women. *N Engl J Med.* 1995;332:1138-43. [PMID: 7700288]
12. **Adler GS.** Medicare beneficiaries rate their medical care: new data from the MCBS (Medicare Current Beneficiary Survey). *Health Care Financ Rev.* 1995; 16:175-87. [PMID: 10172473]
13. **Keeney RL, Raiffa H.** *Decisions with Multiple Objectives: Preferences and Value Tradeoffs.* New York: J Wiley; 1976.
14. **Drummond MF, Stoddart GL, Torrance GW.** *Methods for the Evaluation of Health Care Programmes.* Oxford: Oxford Univ Pr; 1987.
15. **Erickson P, Wilson R, Shannon I.** Healthy People Statistical Notes. No. 7. *Years of Healthy Life.* April 1995. National Center for Health Statistics. Accessed at [www.cdc.gov/nchs/data/statnt/statnt07.pdf](http://www.cdc.gov/nchs/data/statnt/statnt07.pdf) on 6 January 2003.
16. **Erickson P.** Evaluation of a population-based measure of quality of life: the Health and Activity Limitation Index (HALex). *Qual Life Res.* 1998;7:101-14. [PMID: 9523491]
17. **Ware JE Jr.** SF-36 Physical and Mental Health Summary Scales: A Users Manual. Boston: The Health Institute, New England Medical Center; 1994.
18. **Ashby J, Fisher K, Gage B, et al.** State Variations in the Resource Costs of Treating Aged Medicare Beneficiaries. Report no. I-96-01. Washington, DC: Prospective Payment Assessment Commission; 1996.
19. **Hsiao WC, Braun P, Dunn DL, Becker ER, Yntema D, Verrilli DK, et al.** An overview of the development and refinement of the Resource-Based Relative Value Scale. The foundation for reform of U.S. physician payment. *Med Care.* 1992;30:NS1-12. [PMID: 1434963]
20. **Wennberg JE.** *The Dartmouth Atlas of Health Care 1996.* Chicago: American Hospital Publishing; 1996.
21. **Welch WP, Miller ME, Welch HG, Fisher ES, Wennberg JE.** Geographic variation in expenditures for physicians' services in the United States. *N Engl J Med.* 1993;328:621-7. [PMID: 8429854]
